# Supplementary material for: Base-catalyzed thio-lactamization of 2-(1-arylvinyl)anilines with CS2 for the synthesis of quinoline-2-thiones
Source: Royal Society of Chemistry journal article supplement (doi:10.1039/c7cc07633a), 2017-12-07

## SUPPORTING INFORMATION

### **Base-Catalyzed Thio-Lactamization of 2-(1-Arylvinyl)anilines with CS<sub>2</sub> for the Synthesis of Quinoline-2-thiones**

Tong-Lin Wang,<sup>a, †</sup> Xiao-Jun Liu,<sup>a, †</sup> Cong-De Huo,<sup>a</sup> Xi-Cun Wang,<sup>a</sup> Zheng-Jun Quan<sup>\*, a</sup>

<sup>†</sup>Laboratory of Eco-Environment-Related Polymer Materials, Ministry of Education, China. Gansu Key Laboratory of Polymer Materials, College of Chemistry and Chemical Engineering, Northwest Normal University, Lanzhou, Gansu 730070, People's Republic of China

E-mail: [quanzhengjun@hotmail.com](mailto:quanzhengjun@hotmail.com)

#### **Table of Contents**

|                                                                          |            |
|--------------------------------------------------------------------------|------------|
| <b>Table of contents .....</b>                                           | <b>S1</b>  |
| <b>General information.....</b>                                          | <b>S2</b>  |
| <b>Experimental details and characterization data for products .....</b> | <b>S3</b>  |
| <b>References .....</b>                                                  | <b>S10</b> |
| <b>Copies of the NMR Spectra for products .....</b>                      | <b>S11</b> |

## Experimental

### 1.1. General information

<sup>1</sup>H NMR and <sup>13</sup>C NMR data analyses were performed with a Varian Mercury plus-400 and Agilent 600 MHz DD2 instruments unless otherwise specified. CDCl<sub>3</sub> and DMSO-*d*<sub>6</sub> as solvent and tetramethylsilane (TMS) as the internal standard were employed. Chemical shifts were reported in units (ppm) by assigning TMS resonance in the <sup>1</sup>H NMR spectrum as 0.00 ppm. The data of <sup>1</sup>H NMR was reported as follows: chemical shift, multiplicity (s = singlet, d = doublet, t = triplet, m = multiplet and br = broad), coupling constant (*J* values) in Hz and integration. Chemical shift for <sup>13</sup>C NMR spectra were recorded in ppm from TMS using the central peak of CDCl<sub>3</sub> (77.0 ppm) as the internal standard. <sup>19</sup>F NMR spectra were recorded on a Varian Mercury 400 plus instrument. Flash chromatography was performed using 200-300 mesh silica gel with the indicated solvent system according to standard techniques. Analytical thin-layer chromatography (TLC) was performed on pre-coated, glass-backed silica gel plates. Melting points were measured with an XT-4 apparatus. High-resolution mass spectra (HRMS) (ESI) were obtained with a Bruker Daltonics APEX II 47e and Orbitrap Elite mass spectrometer. Column chromatography was generally performed on silica gel (200-300 mesh) and TLC analyses were conducted on silica gel GF254 plates. All reagents were directly used from purchased without any further purification unless otherwise specified.

**1.2 General procedure for the synthesis of 2-(1-aryvinyl)aniline 1.** Starting materials **1** was prepared according to the reported procedures.<sup>1</sup> 1.0 g of montmorillonites K10 was added to a solution of phenylacetylene (1.0 g, 10.0 mmol) and *para*-tolftidine (1.1 g, 10.0 mmol) in the xylene (10.0 mL). The mixture was heated at the 140 °C under stirring for 5 hours. After cooling to room temperature, filtration, washing with diethyl ether and distillation of the solvents. The volatiles were removed in vacuum. The residue was purified by column chromatography on silica gel (ethyl acetate/ petroleum ether 1:5) to give the corresponding products.

**1.3 General procedure for the synthesis of 4-phenylquinoline-2(1H)-thione 2a.** Under an atmosphere of air, 2-(1-phenylvinyl) aniline **1a** (0.5 mmol, 0.0095 g), CS<sub>2</sub> (2.4 eq. 0.6 mmol, 0.0046 g), DBU (5 mol%, 0.00018 g) were added to a tube. DMF (3.0 mL) was added by dropper and the mixture was stirred for 8 h at 140 °C and the reaction was monitored by TLC analysis. Then, 2.0 mL ammonium chloride were added to the mixture to quench the reaction and extracted with ethyl acetate (3×25 mL). The combined organic layers were washed with aqueous NaHCO<sub>3</sub> and brine, dried over MgSO<sub>4</sub>, filtered, and the volatiles were removed in vacuum. The residue was purified by column chromatography on silica gel (ethyl acetate/ petroleum ether 1:5) to give the corresponding products. All of the products **2b-v** were synthesized according to above described procedure.

### 1.4 General procedure for the synthesis of 6-methyl-2-(methylthio)-4-phenylquinoline 3

6-Methyl-4-phenylquinoline-2(1H)-thione **2b** (1.0 mmol, 0.0251 g), MeI (1.2 mmol, 0.01692 g), K<sub>2</sub>CO<sub>3</sub> (1.5 equiv, 1.5 mmol, 0.0207 g), EtOH (3.0 mL) was added by dropper and the mixture was

stirred at 80 °C for 5 h. And the progress of the reaction was monitored by TLC (silica gel). After completion of the reaction, mixture was cooled to ambient temperature, quenched by addition of saturated NH<sub>4</sub>Cl (2.0 mL), and extracted with ethyl acetate (3×10 ml). The organic layers were combined and dried with anhydrous MgSO<sub>4</sub> and concentrated in vacuo, the resulting residue was purified by silica gel column chromatography using ethyl acetate/petroleum ether (1:5) as eluent to afford the products.

#### **1.5 Procedure for the synthesis of 6-methyl-2,4-diphenylquinoline 4**

6-Methyl-4-phenylquinoline-2(1H)-thione **2b** (1.0 mmol, 0.0251 g), phenylboronic acid (1.2 mmol, 0.0167 g), Pd(OAc)<sub>2</sub> (5 mol%, 0.025 mmol, 0.0175 g), CuTC (2.5 equiv, 2.5 mmol, 0.0475 g) was added to the sealed tube, PPh<sub>3</sub> (10 mol%, 0.1 mmol, 0.0262 g), The mixture was stirred at 120 °C for 16 h. And the progress of the reaction was monitored by TLC (silica gel). After completion of the reaction, mixture was cooled to ambient temperature, quenched by addition of saturated NH<sub>4</sub>Cl (2.0 ml), and extracted with ethyl acetate (3×10 mL). The organic layers were combined and dried with anhydrous MgSO<sub>4</sub> and concentrated in vacuo, the resulting residue was purified by silica gel column chromatography using ethyl acetate/petroleum ether(1:20) as eluent to afford the products.

#### **1.6 Procedure for the synthesis of 6-methyl-4-phenyl-2-(phenylthio)quinoline 5**

6-Methyl-4-phenylquinoline-2(1H)-thione **2b** (1.0 mmol, 0.0251 g), phenylboronic acid (1.2 mmol, 0.0167 g), Cu(OAc)<sub>2</sub> (1.0 equiv, 1.0 mmol, 0.0123 g), 1,10-phenanthroline monohydrate (5 mol%, 0.05 mmol, 0.0099 g) was added to the sealed tube, DCE (3.0 ml) was added by dropper and the mixture was stirred at 110 °C for 30 h. And the progress of the reaction was monitored by TLC (silica gel). After completion of the reaction, mixture was cooled to ambient temperature, quenched by addition of saturated NH<sub>4</sub>Cl (2.0 mL), and extracted with ethyl acetate (3×10 mL). The organic layers were combined and dried with anhydrous MgSO<sub>4</sub> and concentrated in vacuo, the resulting residue was purified by silica gel column chromatography using ethyl acetate/petroleum ether (1:20) as eluent to afford the products.

#### **1.7 Procedure for the synthesis of methyl 3-(6-methyl-4-phenyl-2-thioxoquinolin-1(2H)-yl) propanoate 6**

6-Methyl-4-phenylquinoline-2(1H)-thione **2b** (1.0 mmol, 0.0251 g), methyl acrylate (1.2 mmol, 0.01032 g), K<sub>2</sub>CO<sub>3</sub> (30 mol%, 0.3 mmol, 0.00414 g), PEG-400 (3.0 mL) was added by dropper and the mixture was stirred at rt for 18 h. And the progress of the reaction was monitored by TLC (silica gel). After completion of the reaction, mixture was cooled to ambient temperature, quenched by addition of saturated NH<sub>4</sub>Cl (2.0 mL), and extracted with ethyl acetate (3×10 mL). The organic layers were combined and dried with anhydrous MgSO<sub>4</sub> and concentrated in vacuo, the resulting residue was purified by silica gel column chromatography using ethyl acetate/petroleum ether (1:5) as eluent to afford the products.

#### **1.8 Procedure for the synthesis of**

## 6-methyl-2-((6-methyl-4-phenyl-4a,8a-dihydroquinolin-2-yl)disulfanyl)-4-phenylquinoline 7

6-Methyl-4-phenylquinoline-2(1H)-thione **2b** (1.0 mmol, 0.0251 g), DDQ (0.5 mmol, 0.0113 g), NaH (0.5 mmol, 0.0012 g), diaoxane (5 mL) was added by dropper and the mixture was stirred at room temperature for 8 h. And the progress of the reaction was monitored by TLC (silica gel). After completion of the reaction, mixture was cooled to ambient temperature, quenched by addition of saturated NH<sub>4</sub>Cl (2.0 mL), and extracted with ethyl acetate (3×10 mL). The organic layers were combined and dried with anhydrous MgSO<sub>4</sub> and concentrated in vacuo, the resulting residue was purified by silica gel column chromatography using ethyl acetate/petroleum ether (1:5) as eluent to afford the products.

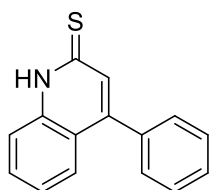

**4-Phenylquinoline-2(1H)-thione (2a)**. Yellow solid (94%, 111.4 mg): mp 187-188 °C. <sup>1</sup>H NMR (600 MHz, CDCl<sub>3</sub>) δ: 7.97 (d, *J* = 9.0 Hz, 1H), 7.79 (d, *J* = 2.4 Hz, 1H), 7.75 (s, 1H), 7.63 (dd, *J* = 9.0, 1.8 Hz, 1H), 7.49 (dd, *J* = 4.8, 1.8 Hz, 3H), 7.40 – 7.38 (m, 2H). <sup>13</sup>C NMR (150 MHz, CDCl<sub>3</sub>) δ: 158.93, 149.16, 146.84, 136.76, 132.34, 131.04, 130.32, 129.33, 128.96, 128.80, 125.98, 124.82, 118.21. HRMS (ESI<sup>+</sup>) *m/z*: Calcd for C<sub>15</sub>H<sub>12</sub>NS 238.0685 [M+H]<sup>+</sup>, Found 238.0683.

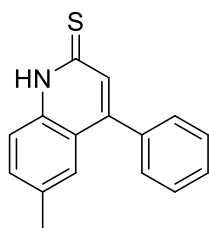

**6-Methyl-4-phenylquinoline-2(1H)-thione (2b)**. Yellow solid (93%, 116.7 mg): mp 215-217 °C. <sup>1</sup>H NMR (600 MHz, DMSO-*d*<sub>6</sub>) δ: 13.68 (s, 1H), 7.60 (d, *J* = 2.4 Hz, 1H), 7.54 – 7.51 (m, 3H), 7.48-7.46 (m, 3H), 7.25 (s, 1H), 7.08 (s, 1H), 2.27 (s, 3H). <sup>13</sup>C NMR (150 MHz, DMSO-*d*<sub>6</sub>) δ: 184.48, 150.91, 143.17, 141.21, 138.83, 137.89, 136.13, 134.21, 134.00, 130.40, 130.38, 126.40, 121.82, 26.01. HRMS (ESI<sup>+</sup>) *m/z*: Calcd for C<sub>16</sub>H<sub>14</sub>NS 252.0841 [M+H]<sup>+</sup>, Found 252.0845.

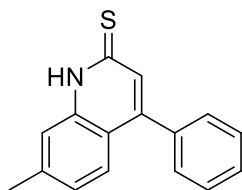

**7-Methyl-4-phenylquinoline-2(1H)-thione (2c)**. Yellow solid (85%, 106.7 mg): mp 252-254 °C. <sup>1</sup>H NMR (600 MHz, DMSO-*d*<sub>6</sub>) δ: 13.52 (s, 1H), 7.52 (d, *J* = 7.2 Hz, 3H), 7.46 (dd, *J* = 7.8, 1.8 Hz, 2H), 7.39 (d, *J* = 9.0 Hz, 1H), 7.21 (d, *J* = 2.4 Hz, 1H), 6.97 (s, 1H), 6.93 (dd, *J* = 9.0, 2.4 Hz, 1H), 3.82 (s, 3H). <sup>13</sup>C NMR (150 MHz, DMSO-*d*<sub>6</sub>) δ: 180.55, 161.93, 146.59, 141.96, 136.58, 129.48, 129.23, 129.19, 128.72, 127.98, 116.05, 114.28, 99.23, 56.05. HRMS (ESI<sup>+</sup>) *m/z*: Calcd for C<sub>16</sub>H<sub>14</sub>NS 252.0841 [M+H]<sup>+</sup>, Found 252.0843.

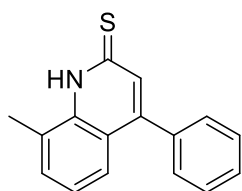

**8-Methyl-4-phenylquinoline-2(1H)-thione (2d)**. Yellow solid (88%, 110.4 mg): mp

185-187 °C. <sup>1</sup>H NMR (600 MHz, CDCl<sub>3</sub>) δ: 13.01 (s, 1H), 7.67 (d, *J* = 9.0 Hz, 1H), 7.53-7.47 (m, 6H), 7.27 – 7.23 (m, 1H), 7.03 (d, *J* = 3.0 Hz, 1H), 3.73 (s, 3H). <sup>13</sup>C NMR (150 MHz, CDCl<sub>3</sub>) δ: 177.34, 156.63, 147.48, 136.37, 131.39, 129.25, 129.16, 128.81, 128.80, 128.64, 121.15, 117.94, 107.50, 55.59. HRMS (ESI<sup>+</sup>) *m/z*: Calcd for C<sub>16</sub>H<sub>14</sub>NS 252.0841 [M+H]<sup>+</sup>, Found 252.0845.

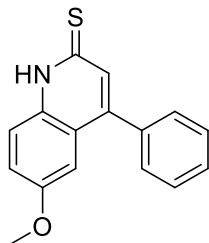

**6-Methoxy-4-phenylquinoline-2(1H)-thione (2e).** Yellow solid (90%, 120.2 mg): mp

181-182 °C. <sup>1</sup>H NMR (400 MHz, DMSO-*d*<sub>6</sub>) δ: 13.75 (s, 1H), 7.70 (d, *J* = 8.0 Hz, 1H), 7.57 (d, *J* = 4.0 Hz, 5H), 7.36 (dd, *J* = 12, 4.0 Hz, 1H), 7.15 (s, 1H), 6.92 (d, *J* = 2.8 Hz, 1H), 3.70 (s, 3H). <sup>13</sup>C NMR (150 MHz, DMSO-*d*<sub>6</sub>) δ: 178.38, 156.09, 145.83, 136.42, 135.23, 131.70, 129.57, 129.32, 129.18, 122.54, 121.16, 118.72, 107.34, 55.76. HRMS (ESI<sup>+</sup>) *m/z*: Calcd for C<sub>16</sub>H<sub>14</sub>NOS 268.0791 [M+H]<sup>+</sup>, Found 268.0794.

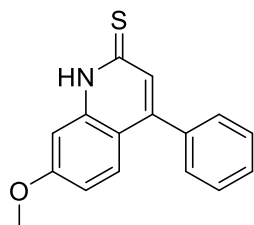

**7-Methoxy-4-phenylquinoline-2(1H)-thione (2f).** Yellow solid (85%, 113.5 mg): mp

256-258 °C. <sup>1</sup>H NMR (400 MHz, DMSO-*d*<sub>6</sub>) δ: 12.10 (s, 1H), 7.57 – 7.50 (m, 5H), 7.30 – 7.28 (m, 2H), 7.19 (s, 1H), 7.08 (dd, *J* = 7.2, 2.4 Hz, 1H), 4.00 (s, 3H). <sup>13</sup>C NMR (150 MHz, DMSO-*d*<sub>6</sub>) δ: 180.20, 146.42, 146.32, 136.37, 132.00, 130.39, 129.57, 129.25, 129.21, 124.84, 122.30, 118.00, 112.00, 56.89. HRMS (ESI<sup>+</sup>) *m/z*: Calcd for C<sub>16</sub>H<sub>14</sub>NOS 268.0791 [M+H]<sup>+</sup>, Found 268.0793.

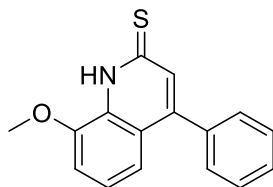

**8-Methoxy-4-phenylquinoline-2(1H)-thione (2g).** Yellow solid (82%, 109.5 mg): mp

216-218 °C. <sup>1</sup>H NMR (400 MHz, CDCl<sub>3</sub>) δ: 10.96 (s, 1H), 7.51 – 7.44 (m, 6H), 7.20 (d, *J* = 6.8 Hz, 2H), 7.04 (dd, *J* = 6.8, 2.4 Hz, 1H), 4.04 (s, 3H). <sup>13</sup>C NMR (150 MHz, CDCl<sub>3</sub>) δ: 180.04, 147.14, 136.29, 131.97, 130.00, 129.10, 128.90, 128.65, 123.99, 118.45, 110.17, 56.21. HRMS (ESI<sup>+</sup>) *m/z*: Calcd for C<sub>16</sub>H<sub>14</sub>NOS 268.0791 [M+H]<sup>+</sup>, Found 268.0792.

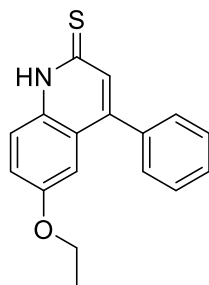

**6-Ethoxy-4-phenylquinoline-2(1H)-thione (2h).** Yellow solid (79%, 110.9 mg): mp

159-162 °C. <sup>1</sup>H NMR (600 MHz, DMSO-*d*<sub>6</sub>) δ: 13.68 (s, 1H), 7.65 (d, *J* = 6.0 Hz, 1H), 7.54-7.49 (m, 5H), 7.31 (dd, *J* = 6.0, 6.0 Hz, 1H), 7.10 (s, 1H), 6.85 (d, *J* = 3.0 Hz, 1H), 3.89 (q, *J* = 6.6 Hz, 2H), 1.25 (t, *J* = 6.6 Hz, 3H).

$^{13}\text{C}$  NMR (150 MHz,  $\text{DMSO-}d_6$ )  $\delta$ : 178.35, 155.37, 145.84, 136.43, 135.13, 131.63, 129.56, 129.32, 129.16, 122.58, 121.41, 118.69, 108.03, 63.87, 14.87. HRMS (ESI<sup>+</sup>)  $m/z$ : Calcd for  $\text{C}_{17}\text{H}_{16}\text{NOS}$  282.0947  $[\text{M}+\text{H}]^+$ , Found 282.0949.

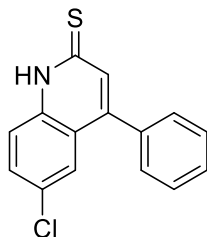

**6-Chloro-4-phenylquinoline-2(1H)-thione (2i).** Yellow solid (60%, 81.3 mg): mp 213-215 °C.  $^1\text{H}$  NMR (400 MHz,  $\text{CDCl}_3$ )  $\delta$ : 7.97 (d,  $J$  = 8.0 Hz, 1H), 7.79 (d,  $J$  = 4.0 Hz, 1H), 7.76 (s, 1H), 7.63 (dd,  $J$  = 8.0, 4.0 Hz, 1H), 7.50-7.48 (m, 3H), 7.39 (dd,  $J$  = 8.0, 4.0 Hz, 2H).  $^{13}\text{C}$  NMR (150 MHz,  $\text{CDCl}_3$ )  $\delta$ : 158.94, 149.14, 146.86, 136.77, 132.33, 131.03, 130.33, 129.33, 128.96, 128.80, 125.98, 124.81, 118.21. HRMS (ESI<sup>+</sup>)  $m/z$ : Calcd for  $\text{C}_{15}\text{H}_{11}\text{ClNS}$  272.0295  $[\text{M}+\text{H}]^+$ , Found 272.0297.

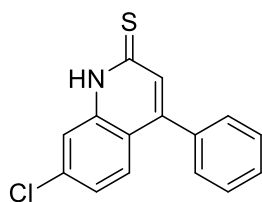

**7-Chloro-4-phenylquinoline-2(1H)-thione (2j).** Yellow solid (67%, 90.8 mg): mp 243-245 °C.  $^1\text{H}$  NMR (400 MHz,  $\text{DMSO-}d_6$ )  $\delta$ : 13.96 (s, 1H), 7.73 (dd,  $J$  = 8.4, 1.2 Hz, 1H), 7.60 (t,  $J$  = 7.6 Hz, 1H), 7.45-7.43 (m, 3H), 7.35-7.32 (m, 3H), 7.05 (s, 1H).  $^{13}\text{C}$  NMR (150 MHz,  $\text{DMSO-}d_6$ )  $\delta$ : 180.19, 144.95, 142.11, 139.35, 135.18, 131.92, 131.44, 128.57, 128.54, 128.33, 127.49, 119.10, 116.76. HRMS (ESI<sup>+</sup>)  $m/z$ : Calcd for  $\text{C}_{15}\text{H}_{11}\text{ClNS}$  272.0295  $[\text{M}+\text{H}]^+$ , Found 272.0297.

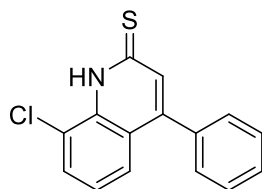

**8-Chloro-4-phenylquinoline-2(1H)-thione (2k).** Yellow solid (41%, 55.6 mg): mp 187-188 °C.  $^1\text{H}$  NMR (600 MHz,  $\text{DMSO-}d_6$ )  $\delta$ : 13.73 (s, 1H), 7.68 (d,  $J$  = 2.4 Hz, 1H), 7.54 – 7.51 (m, 3H), 7.48 – 7.45 (m, 3H), 7.30 (dd,  $J$  = 1.8,  $J$  = 8.4 Hz, 1H), 7.10 (d,  $J$  = 1.2 Hz, 1H).  $^{13}\text{C}$  NMR (150 MHz,  $\text{DMSO-}d_6$ )  $\delta$ : 186.36, 150.52, 145.49, 140.98, 140.64, 136.39, 134.43, 134.03 (d,  $J$  = 8.6 Hz), 133.16, 129.56, 125.25, 120.93. HRMS (ESI<sup>+</sup>)  $m/z$ : Calcd for  $\text{C}_{15}\text{H}_{11}\text{ClNS}$  272.0295  $[\text{M}+\text{H}]^+$ , Found 272.0297.

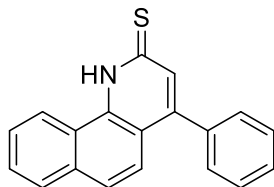

**4-Phenylbenzo[h]quinoline-2(1H)-thione (2l).** Yellow solid (80%, 114.8 mg): mp 180-184 °C.  $^1\text{H}$  NMR (400 MHz,  $\text{CDCl}_3$ )  $\delta$ : 9.24 (d,  $J$  = 12.0 Hz, 1H), 7.90 (s, 1H), 7.84 (d,  $J$  = 11.6 Hz, 1H), 7.17 – 7.56 (m, 5H), 7.44 (s, 5H).  $^{13}\text{C}$  NMR (150 MHz,  $\text{CDCl}_3$ )  $\delta$ : 157.37, 149.56, 146.89, 137.96, 133.59, 130.90, 129.58, 128.53, 128.48, 128.42, 127.40, 127.16, 127.02, 125.21, 122.73 (d,  $J$  = 30.0 Hz), 118.73. HRMS (ESI<sup>+</sup>)  $m/z$ : Calcd for  $\text{C}_{19}\text{H}_{14}\text{NS}$  288.0841  $[\text{M}+\text{H}]^+$ , Found 288.0844.

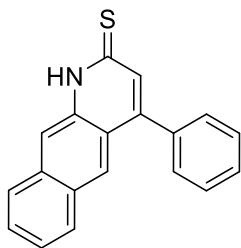

**4-Phenylbenzo[g]quinoline-2(1H)-thione (2m).** Yellow solid (92%, 132.0 mg): mp 244-246 °C. <sup>1</sup>H NMR (400 MHz, DMSO-*d*<sub>6</sub>) δ: 14.07 (s, 1H), 8.16 (d, *J* = 8.8 Hz, 1H), 7.96 (d, *J* = 7.6 Hz, 1H), 7.86 (d, *J* = 9.2 Hz, 1H), 7.58 – 7.57 (m, 3H), 7.47-7.40 (m, 3H), 7.25 (d, *J* = 8.4 Hz, 1H), 7.17 (d, *J* = 8.4 Hz, 2H). <sup>13</sup>C NMR (150 MHz, DMSO-*d*<sub>6</sub>) δ: 178.13, 147.36, 141.06 (d, *J* = 1.5 Hz), 134.19, 134.00, 131.23, 129.70 (d, *J* = 3.0 Hz), 129.11 (d, *J* = 11.0 Hz), 127.99, 127.07, 126.11, 125.85, 117.32, 116.64. HRMS (ESI<sup>+</sup>) *m/z*: Calcd for C<sub>19</sub>H<sub>14</sub>NS 288.0841 [M+H]<sup>+</sup>, Found 288.0843.

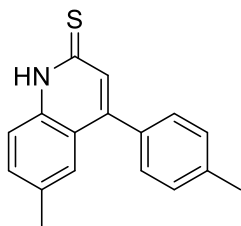

**6-Methyl-4-(p-tolyl)quinoline-2(1H)-thione (2n).** Yellow solid (89%, 129.9 mg): mp 194-196 °C. <sup>1</sup>H NMR (400 MHz, CDCl<sub>3</sub>) δ: 7.93 (d, *J* = 8.4 Hz, 1H), 7.72 (s, 1H), 7.60 (d, *J* = 1.6 Hz, 1H), 7.51 (dd, *J* = 8.4, 2.0 Hz, 1H), 7.31-7.27 (m, 4H), 2.42 (d, *J* = 1.6 Hz, 6H). <sup>13</sup>C NMR (150 MHz, CDCl<sub>3</sub>) δ: 157.74, 149.39, 147.03, 138.47, 136.21, 134.74, 132.22, 129.39, 129.25, 128.42, 125.23, 124.80, 117.36, 21.74, 21.28. HRMS (ESI<sup>+</sup>) *m/z*: Calcd for C<sub>17</sub>H<sub>16</sub>NS 266.0998 [M+H]<sup>+</sup>, Found 266.1002.

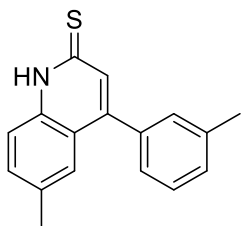

**6-Methyl-4-(m-tolyl)quinoline-2(1H)-thione (2o).** Yellow solid (84%, 111.3 mg): mp 242-244 °C. <sup>1</sup>H NMR (600 MHz, CDCl<sub>3</sub>) δ: 12.99 (s, 1H), 7.62 (d, *J* = 9.0 Hz, 1H), 7.41 (dd, *J* = 18.0, 10.8 Hz, 4H), 7.32 (d, *J* = 7.2 Hz, 1H), 7.27 (t, *J* = 7.8 Hz, 2H), 2.45 (s, 3H), 2.36 (s, 3H). <sup>13</sup>C NMR (150 MHz, CDCl<sub>3</sub>) δ: 178.62, 148.02, 138.54, 137.77, 136.36, 134.67, 132.83, 131.00, 129.78, 129.56, 128.49, 126.10 (d, *J* = 2.7 Hz), 122.49, 116.41, 21.40. HRMS (ESI<sup>+</sup>) *m/z*: Calcd for C<sub>17</sub>H<sub>16</sub>NS 266.0998 [M+H]<sup>+</sup>, Found 266.1000.

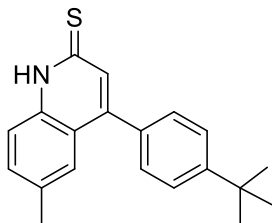

**4-(4-(*Tert*-butyl)phenyl)-6-methylquinoline-2(1H)-thione (2p).** Yellow solid (88%, 135.1 mg): mp 253-255 °C. <sup>1</sup>H NMR (600 MHz, CDCl<sub>3</sub>) δ: 13.34 (s, 1H), 7.69 (d, *J* = 8.4 Hz, 1H), 7.53 (d, *J* = 8.4 Hz, 2H), 7.48 (s, 1H), 7.46 (s, 1H), 7.11 (t, *J* = 8.4 Hz, 3H), 2.37 (s, 3H), 1.40 (s, 9H). <sup>13</sup>C NMR (150 MHz, CDCl<sub>3</sub>) δ: 178.34, 152.30, 147.91, 137.91, 134.62, 133.43, 132.78, 130.97, 128.80, 126.11, 125.66, 122.47, 116.54, 34.81, 31.31, 21.35. HRMS (ESI<sup>+</sup>) *m/z*: Calcd for C<sub>20</sub>H<sub>22</sub>NS 322.1624 [M+H]<sup>+</sup>, Found 322.1621.

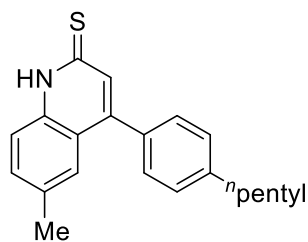

**6-Methyl-4-(4-pentylphenyl)quinoline-2(1H)-thione (2q).** Yellow solid (88%, 141.2 mg): mp 215-217 °C. <sup>1</sup>H NMR (600 MHz, CDCl<sub>3</sub>) δ: 13.0 (s, 1H), 7.64–7.61 (m, 1H), 7.45 (d, *J* = 10.2 Hz, 2H), 7.40 (m, 3H), 7.32 (d, *J* = 7.8 Hz, 2H), 2.78–2.61 (m, 1H), 2.36 (s, 2H), 1.79–1.65 (m, 1H), 1.38 (dd, *J* = 7.4, 3.6 Hz, 2H), 0.97–0.86 (m, 2H). <sup>13</sup>C NMR (150 MHz, CDCl<sub>3</sub>) δ: 178.55, 147.97, 144.19, 137.80, 134.62, 133.63, 132.78, 130.97, 128.93, 128.72, 126.15, 122.48, 116.42, 35.77, 31.58, 31.01, 22.54, 21.33, 14.03. HRMS (ESI<sup>+</sup>) *m/z*: Calcd for C<sub>21</sub>H<sub>24</sub>NS 322.1624 [M+H]<sup>+</sup>, Found 322.1626.

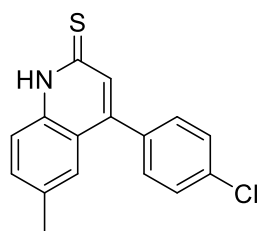

**4-(4-Chlorophenyl)-6-methylquinoline-2(1H)-thione (2r).** Yellow solid (87%, 123.9 mg): mp 240-243 °C. <sup>1</sup>H NMR (600 MHz, CDCl<sub>3</sub>) δ: 13.16 (s, 1H), 7.65 (d, *J* = 8.4 Hz, 1H), 7.46–7.32 (m, 4H), 7.35 (s, 1H), 7.22 (t, *J* = 8.4 Hz, 2H), 2.36 (s, 3H). <sup>13</sup>C NMR (150 MHz, CDCl<sub>3</sub>) δ: 178.55, 164.03, 162.37, 146.76, 137.81, 134.90, 133.00, 132.33 (d, *J* = 3.4 Hz), 131.18, 130.79 (d, *J* = 8.4 Hz), 125.78, 122.37, 116.52, 115.97, 115.82, 21.35. HRMS (ESI<sup>+</sup>) *m/z*: Calcd for C<sub>16</sub>H<sub>13</sub>ClNS 286.0452 [M+H]<sup>+</sup>, Found 286.0454.

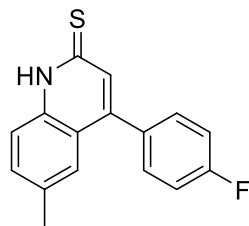

**4-(2-Fluorophenyl)-6-methylquinoline-2(1H)-thione (2s).** Yellow solid (78%, 104.9 mg): mp 230-233 °C. <sup>1</sup>H NMR (600 MHz, CDCl<sub>3</sub>) δ: 11.86 (s, 1H), 7.51-7.34 (m, 8H), 2.38 (s, 3H). <sup>13</sup>C NMR (150 MHz, DMSO-*d*<sub>6</sub>) δ: 179.73, 144.93, 135.27, 134.28 (d, *J* = 66.0 Hz), 133.23, 131.46, 131.17, 129.30, 125.49, 121.48, 117.08, 21.23. <sup>19</sup>F NMR (CDCl<sub>3</sub>, 376.5 MHz) δ: -112.22 – (-)112.27 (m). HRMS (ESI<sup>+</sup>) *m/z*: Calcd for C<sub>16</sub>H<sub>13</sub>FNS 270.0747 [M+H]<sup>+</sup>, Found 270.0743.

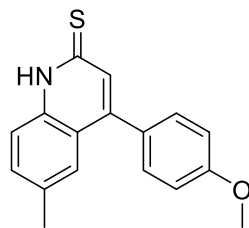

**4-(4-Methoxyphenyl)-6-methylquinoline-2(1H)-thione (2t).** Yellow solid (95%, 133.5 mg): mp 192-194 °C. <sup>1</sup>H NMR (600 MHz, CDCl<sub>3</sub>) δ: 7.91 (d, *J* = 9.0 Hz, 1H), 7.52–7.46 (m, 8H), 7.14 (s, 1H), 2.72 (s, 3H), 2.42 (s, 3H). <sup>13</sup>C NMR (150 MHz, CDCl<sub>3</sub>) δ: 179.69, 146.16, 143.90, 138.44, 134.00, 133.76, 133.07, 131.27, 129.17 (d, *J* = 10.1 Hz), 125.69, 121.66, 117.07, 35.34, 21.27. HRMS (ESI<sup>+</sup>) *m/z*: Calcd for C<sub>17</sub>H<sub>16</sub>NOS 282.0947 [M+H]<sup>+</sup>, Found 282.0951.



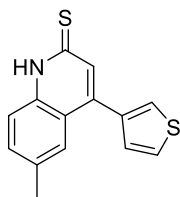

**6-methyl-4-(thiophen-3-yl)quinoline-2(1H)-thione (2u).** Yellow solid (75%, 96.4 mg): mp 333-335 °C. <sup>1</sup>H NMR (600 MHz, CDCl<sub>3</sub>) δ = 10.91 (s, 1H), 7.93 (d, *J* = 6.0 Hz, 1H), 7.79 (s, 1H), 7.73 (s, 1H), 7.54 (d, *J* = 6.0 Hz, 1H), 7.52 (d, *J* = 0.6 Hz, 1H), 7.45 – 7.42 (m, 2H), 7.23 (dd, *J* = 1.2, 1.2 Hz, 1H), 2.46 (s, 3H). <sup>13</sup>C NMR (150 MHz, CDCl<sub>3</sub>) δ = 157.81, 147.11, 144.00, 138.10, 136.44, 132.33, 128.78, 128.53, 126.21, 125.21, 125.16, 124.57, 117.19, 21.78. HRMS (ESI<sup>+</sup>) *m/z*: Calcd for C<sub>14</sub>H<sub>12</sub>NS<sub>2</sub> 258.0406 [M+H]<sup>+</sup>, Found 258.0409.

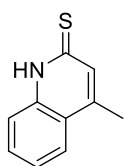

**4-methylquinoline-2(1H)-thione (2v).** Yellow solid (85%, 74.4 mg): mp 265-267 °C. <sup>1</sup>H NMR (600 MHz, DMSO-*d*<sub>6</sub>) δ = 13.44 (s, 1H), 7.76 (d, *J* = 6.0 Hz, 1H), 7.60 – 7.56 (m, 2H), 7.31 (m, 1H), 7.17 (s, 1H), 2.41 (s, 3H). <sup>13</sup>C NMR (150 MHz, DMSO-*d*<sub>6</sub>) δ = 180.75, 143.68, 139.26, 131.38, 131.37, 125.09, 124.41, 122.91, 116.81, 18.38. HRMS (ESI<sup>+</sup>) *m/z*: Calcd for C<sub>19</sub>H<sub>13</sub>NS 176.0528 [M+H]<sup>+</sup>, Found 176.0530.

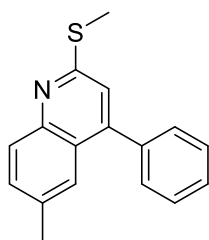

**6-Methyl-2-(methylthio)-4-phenylquinoline (3).** White solid (79%, 209.4 mg): mp 158-160 °C. <sup>1</sup>H NMR (400 MHz, CDCl<sub>3</sub>) δ: 7.91 (d, *J* = 8.4 Hz, 1H), 7.55 – 7.45 (m, 7H), 7.13 (s, 1H), 2.72 (s, 3H), 2.41 (s, 3H). <sup>13</sup>C NMR (150 MHz, CDCl<sub>3</sub>) δ: 158.28, 147.40, 147.10, 137.96, 134.94, 131.53, 129.40, 128.49, 128.28, 128.11, 124.77, 124.58, 120.56, 21.63, 12.93. HRMS (ESI<sup>+</sup>) *m/z*: Calcd for C<sub>17</sub>H<sub>16</sub>NS 266.0998 [M+H]<sup>+</sup>, Found 266.0995.

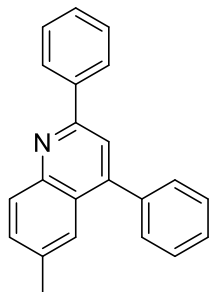

**6-Methyl-2,4-diphenylquinoline (4).** White solid (69%, 283.6 mg): mp 126-128 °C. <sup>1</sup>H NMR (600 MHz, CDCl<sub>3</sub>) δ: 8.22 – 8.18 (m, 2H), 8.16 (d, *J* = 8.64 Hz, 1H), 7.79 (s, 1H), 7.67 (s, 1H), 7.59 – 7.51 (m, 8H), 7.46 (t, *J* = 7.2 Hz, 1H), 2.48 (s, 3H). <sup>13</sup>C NMR (150 MHz, CDCl<sub>3</sub>) δ: 156.00, 148.43, 147.40, 139.76, 138.65, 136.26, 131.75, 129.87, 129.55, 129.14, 128.79, 128.57, 128.28, 127.48, 125.71, 124.38, 119.40, 21.83. HRMS (ESI<sup>+</sup>) *m/z*: Calcd for C<sub>22</sub>H<sub>18</sub>N 296.1434 [M+H]<sup>+</sup>, Found 296.1435.

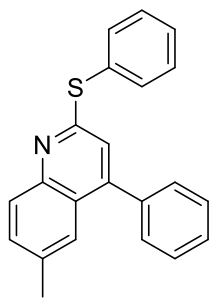

**6-Methyl-4-phenyl-2-(phenylthio)quinoline (5).** White solid (74%, 242.0 mg): mp

180-184 °C. <sup>1</sup>H NMR (600 MHz, CDCl<sub>3</sub>) δ: 7.91 (d, *J* = 8.4 Hz, 1H), 7.68 – 7.64 (m, 2H), 7.53 – 7.44 (m, 5H), 7.40 (m, 5H), 6.94 (s, 1H), 2.42 (s, 3H). <sup>13</sup>C NMR (150 MHz, CDCl<sub>3</sub>) δ: 159.60, 148.33, 147.16, 137.86, 135.74, 134.69, 131.98, 131.24, 129.50, 129.36, 128.93, 128.52 (d, *J* = 11.5 Hz), 128.32, 124.63 (d, *J* = 10.4 Hz), 119.83, 21.70. HRMS (ESI<sup>+</sup>) *m/z*: Calcd for C<sub>22</sub>H<sub>18</sub>NS 328.1154 [M+H]<sup>+</sup>, Found 328.1156

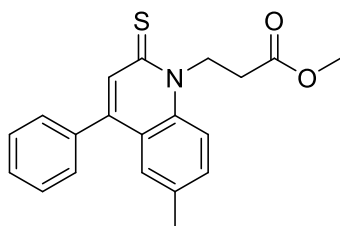

**Methyl 3-(6-methyl-4-phenyl-2-thioxoquinolin-1(2H)-yl)propanoate (6).**

Oil (67%, 225.8 mg): <sup>1</sup>H NMR (400 MHz, CDCl<sub>3</sub>) δ: 7.92–7.88 (d, *J* = 7.6 Hz, 1H), 7.52 – 7.45 (m, 7H), 7.25 (s, 1H), 7.10 (d, *J* = 2.4 Hz, 1H), 3.73 (d, *J* = 2.4 Hz, 3H), 3.61 (td, *J* = 7.0, 2.2 Hz, 2H), 2.93 (td, *J* = 7.0, 2.2 Hz, 2H), 2.42 (s, 3H). <sup>13</sup>C NMR (150 MHz, CDCl<sub>3</sub>) δ: 172.75, 156.68, 137.84, 135.11, 131.54, 130.87, 129.36, 128.81, 128.49, 128.26 (d, *J* = 14.0 Hz), 124.72, 120.90, 65.54, 51.73, 34.48, 21.63. HRMS (ESI<sup>+</sup>) *m/z*: Calcd for C<sub>20</sub>H<sub>20</sub>NO<sub>2</sub>S 338.1209 [M+H]<sup>+</sup>, Found 338.1211.

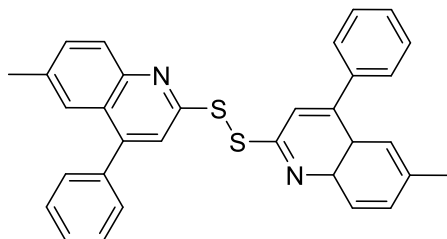

**6-Methyl-2-((6-methyl-4-phenyl-4a,8a-dihydroquinolin-2-yl)disulfanyl)-4-phenylquinoline (7).** White solid (92%, 460.0 mg) : mp 199-201 °C. <sup>1</sup>H NMR (600 MHz, CDCl<sub>3</sub>) δ: 7.94 (d, *J* = 8.8 Hz, 1H), 7.75 (s, 1H), 7.57 (s, 1H), 7.52 (d, *J* = 8.4 Hz, 1H), 7.46 (m, 3H), 7.42 – 7.38 (m, 2H), 2.42 (s, 3H). <sup>13</sup>C NMR (150 MHz, CDCl<sub>3</sub>) δ: 157.75, 149.28, 147.07, 137.68, 136.33, 132.28, 129.46, 128.51 (d, *J* = 6.5 Hz), 125.13, 124.72, 117.43, 21.74. HRMS (ESI<sup>+</sup>) *m/z*: Calcd for C<sub>32</sub>H<sub>27</sub>N<sub>2</sub>S<sub>2</sub> 503.1610 [M+H]<sup>+</sup>, Found 503.1613.

## References

- (a) Mameda, N.; Peraka, S.; Kodumuri, S.; Chevella, D.; Marri, M. R.; Nama, N. *RSC Adv.* **2015**, *5*, 78374. (b) Arienti, A. Bigi, F.; Maggi, R.; Marzi, E.; Moggi, P.; Rastelli, M.; Sartori, G.; Tarantola, F. *Tetrahedron* **1997**, *53*, 3795.

Copies of NMR of compound **2a**.

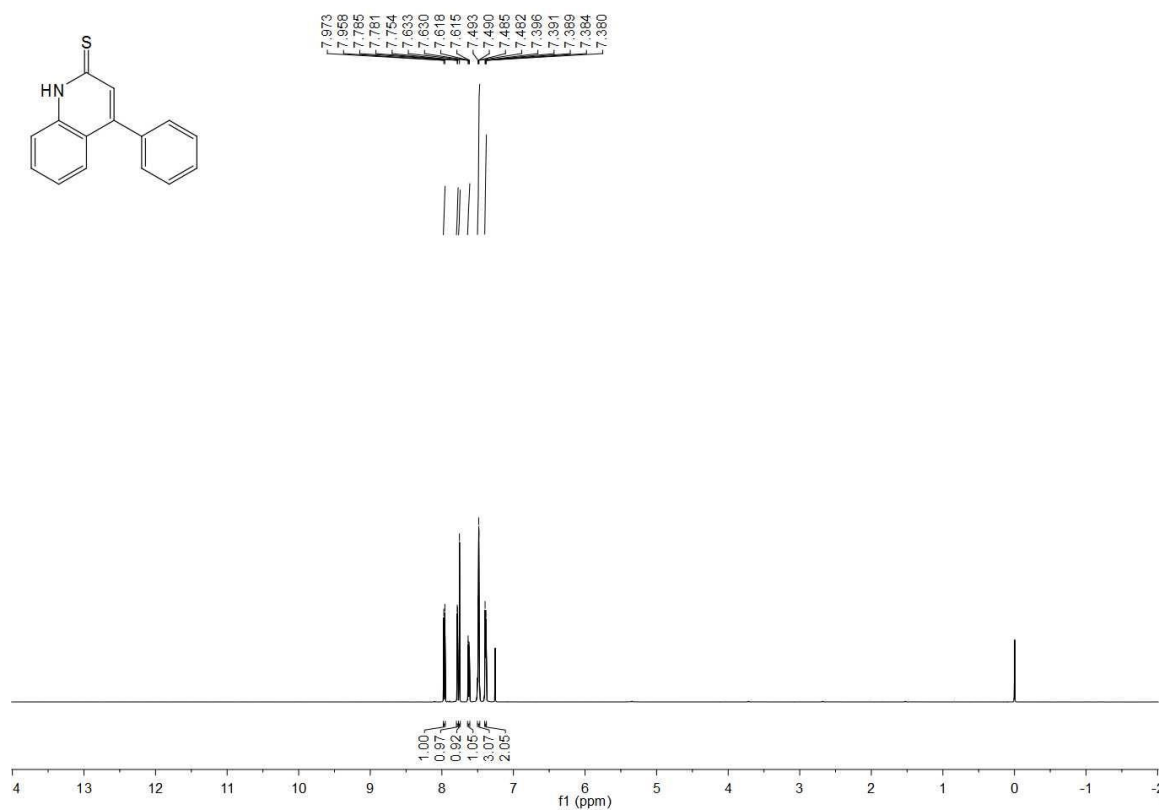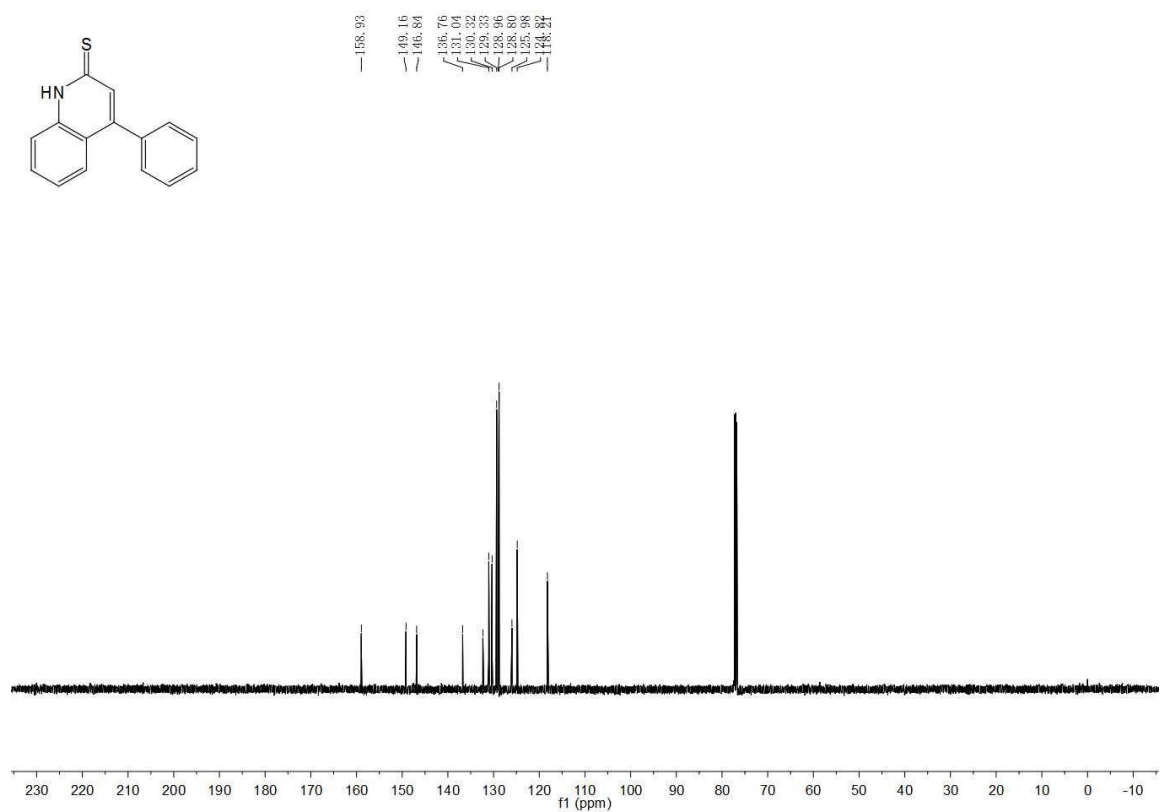

Copies of NMR of compound **2b**.

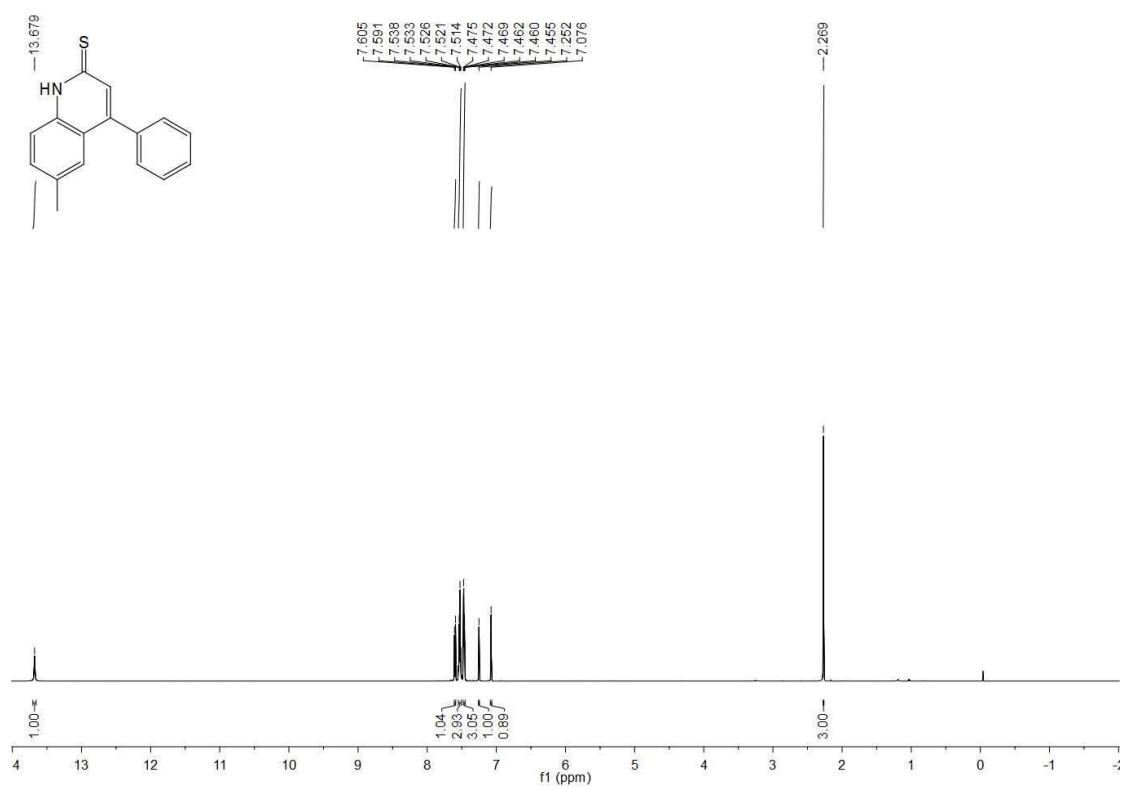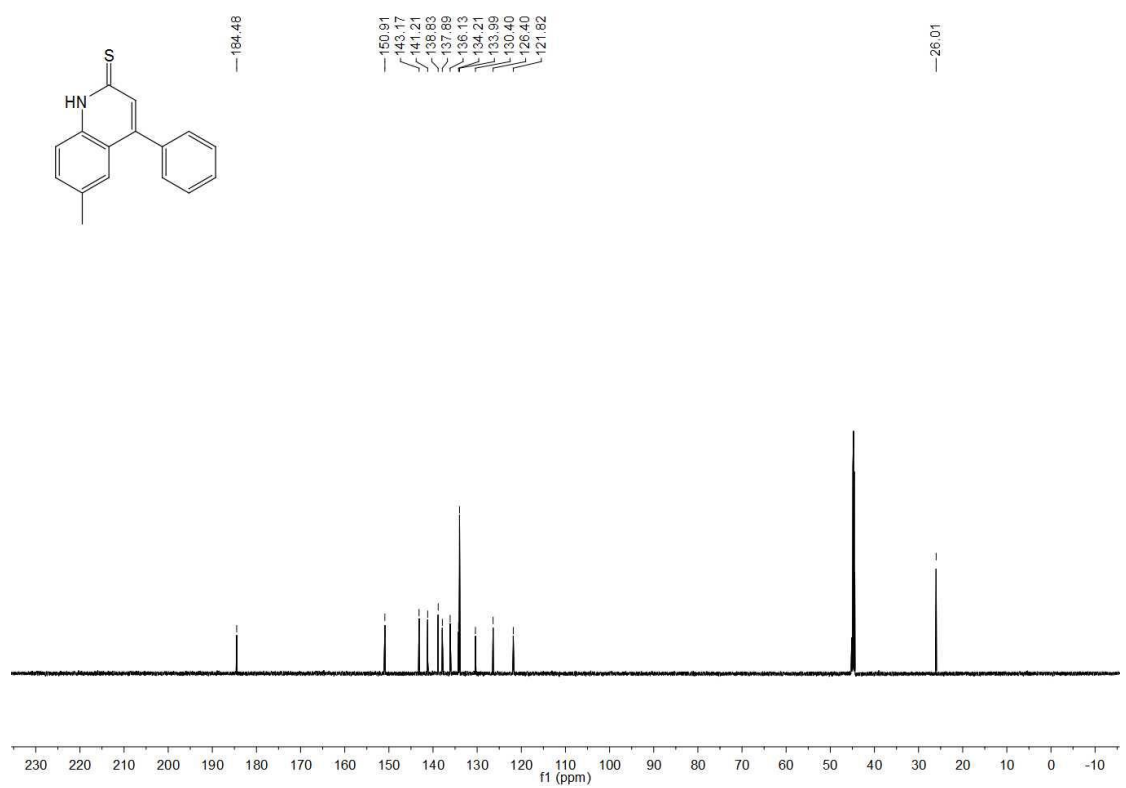

Copies of NMR of compound **2c**.

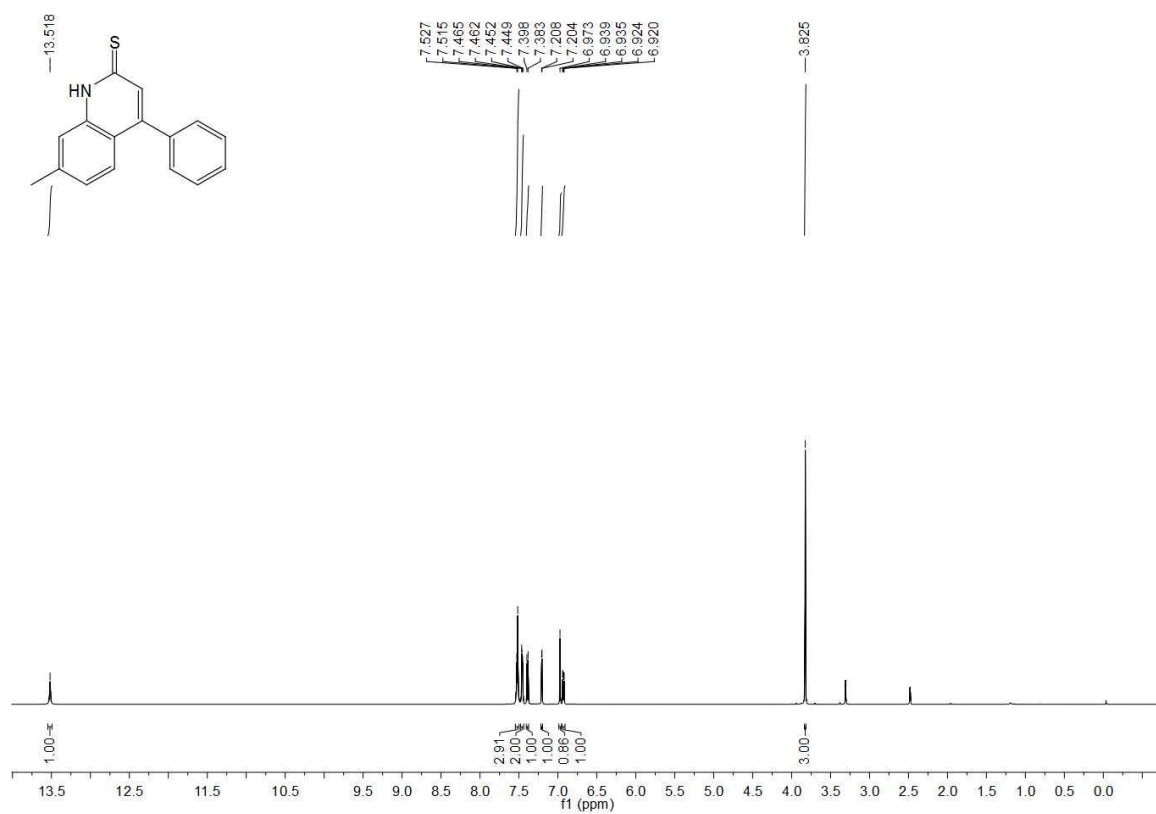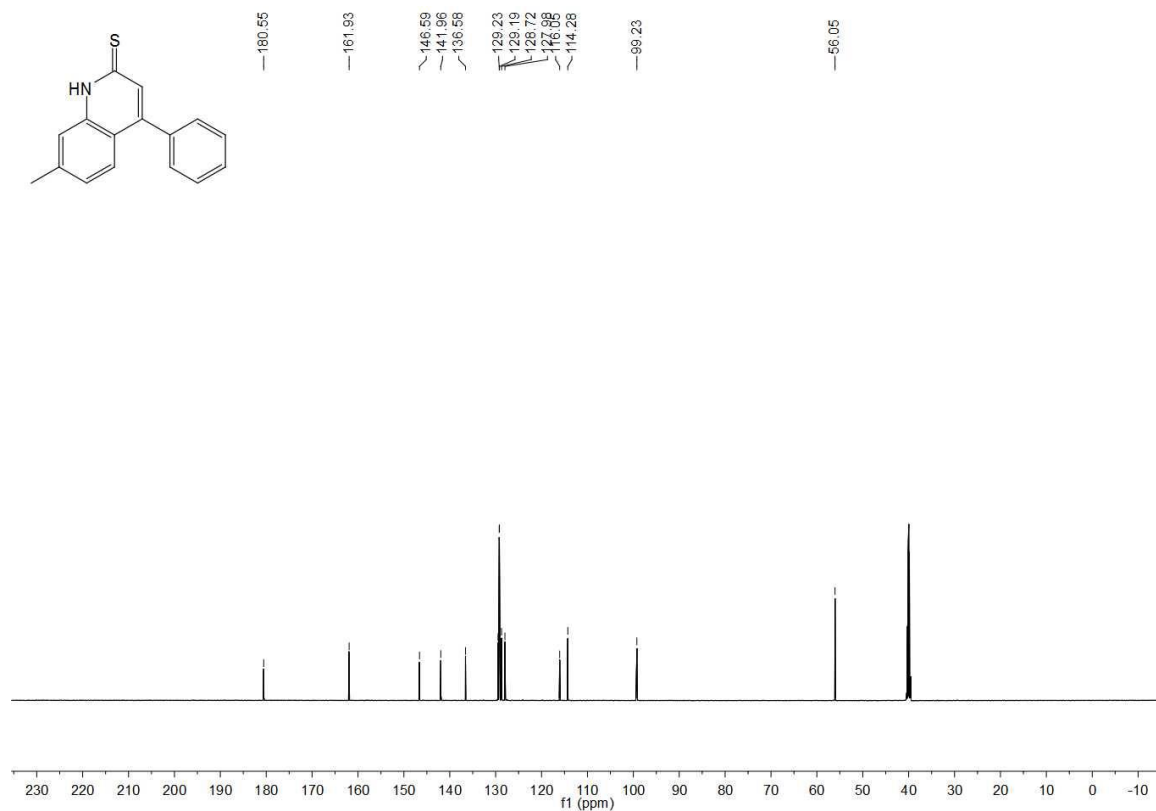

Copies of NMR of compound **2d**.

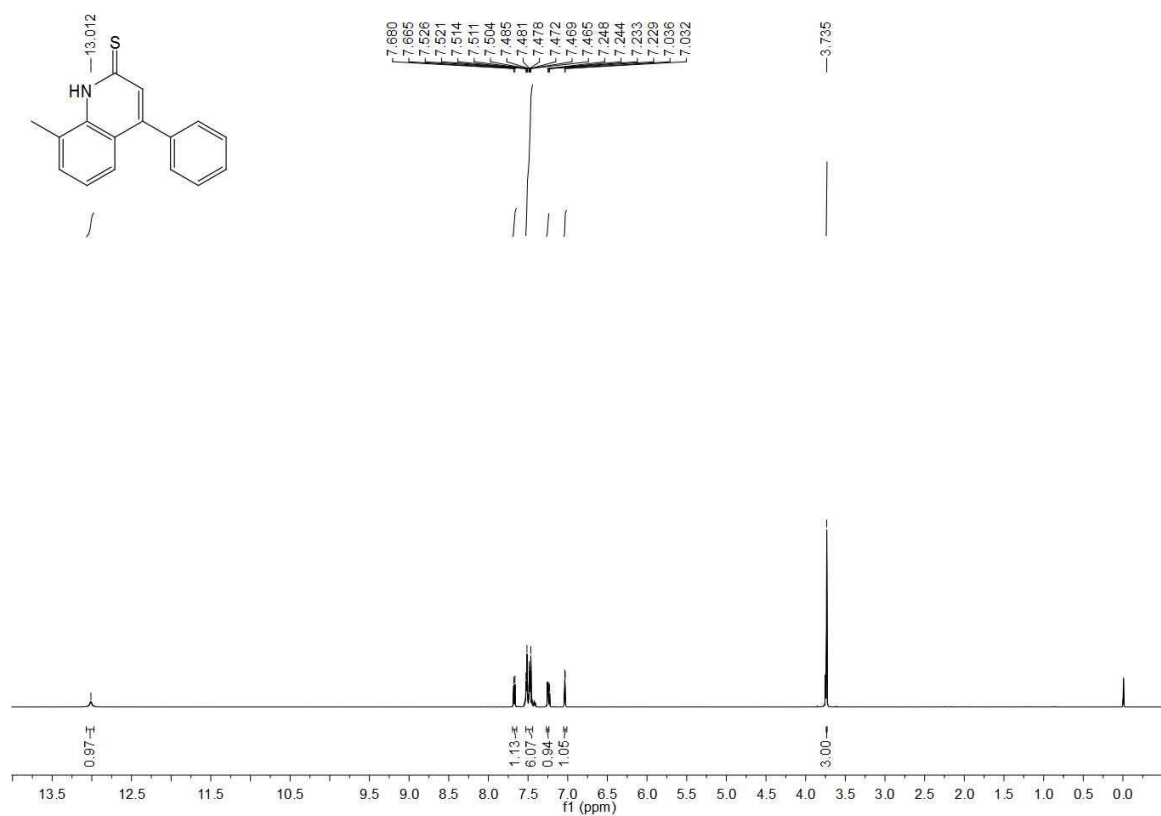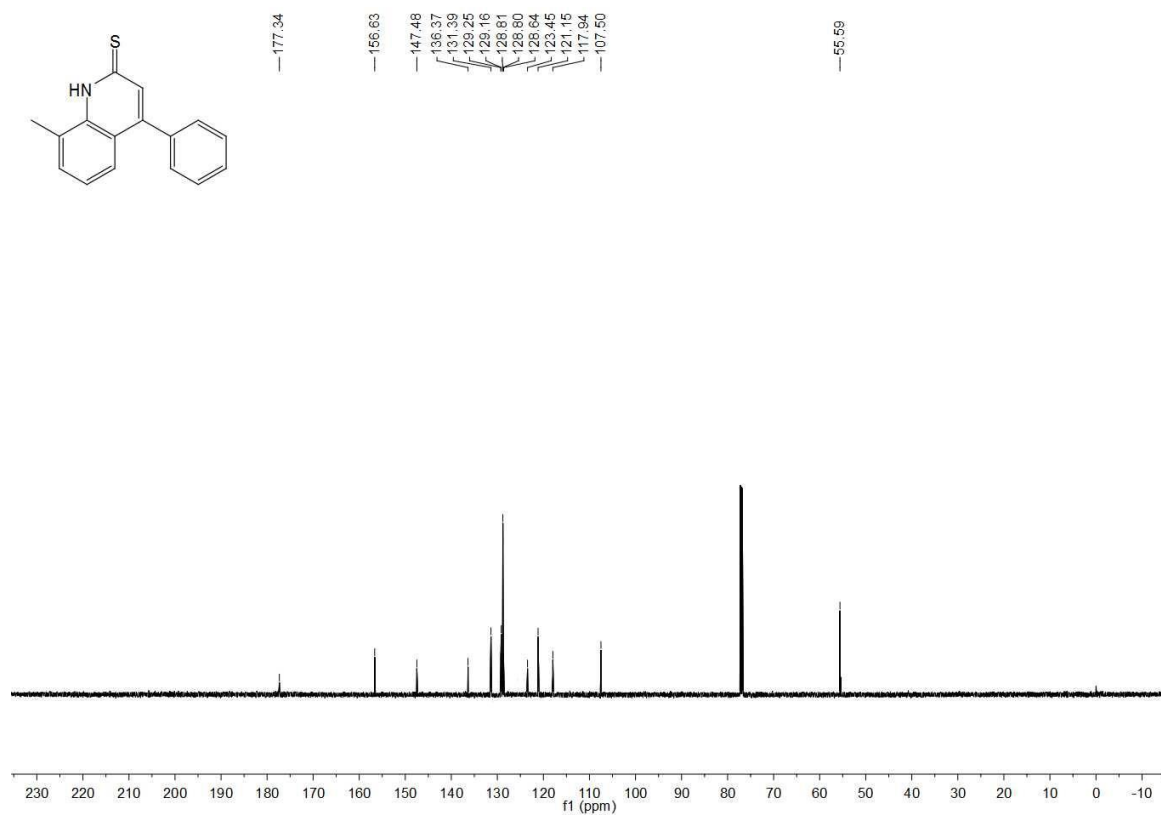

Copies of NMR of compound **2e**.

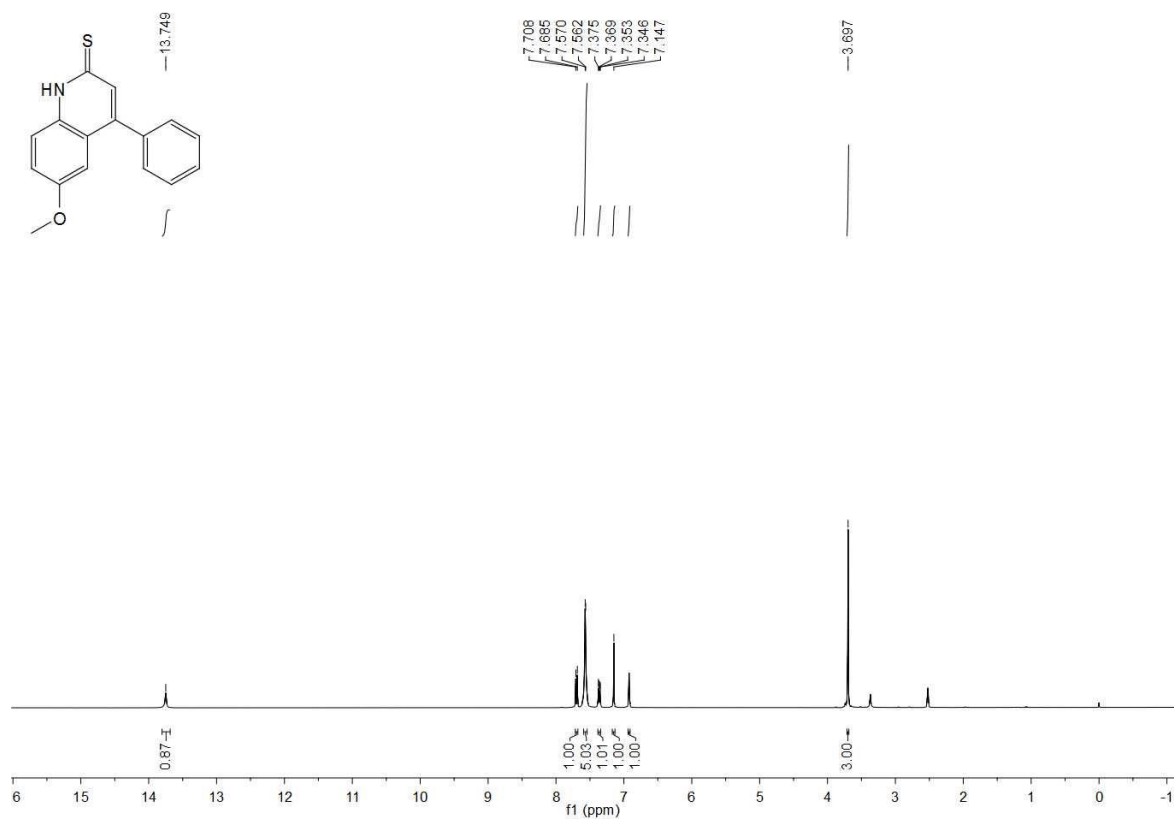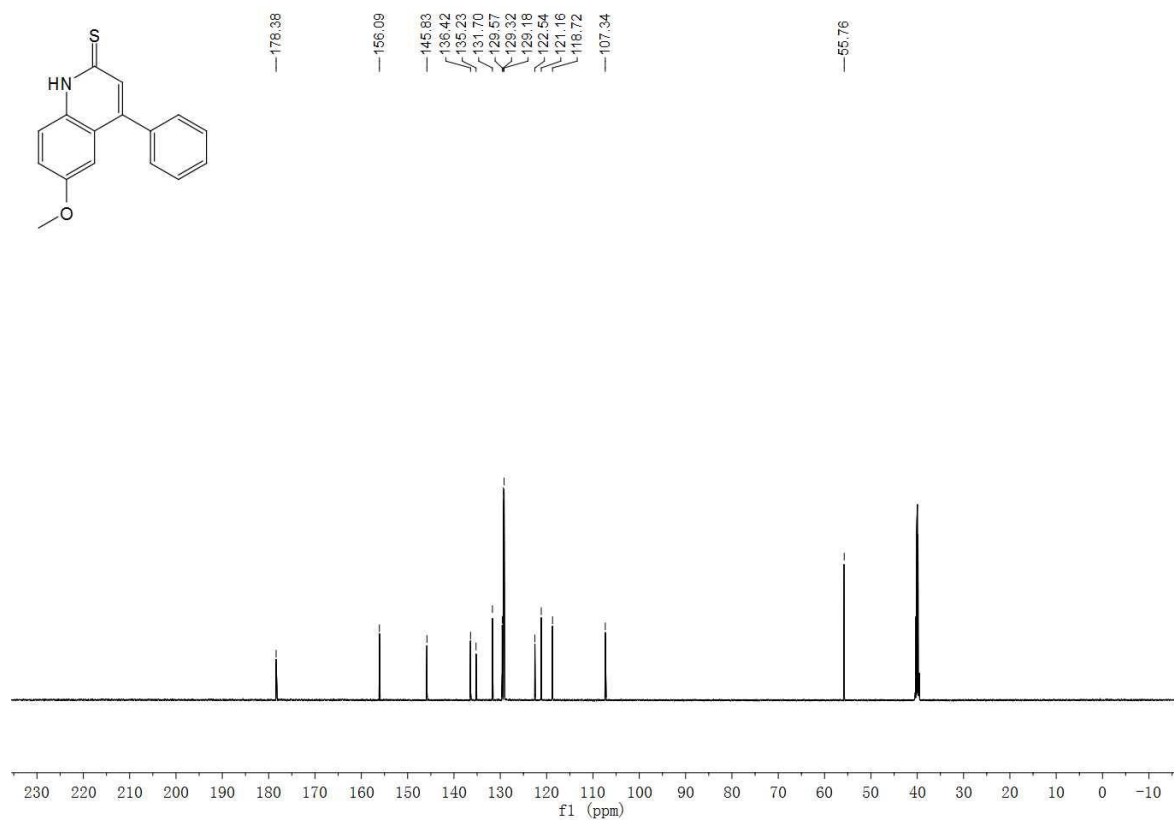

Copies of NMR of compound **2f**.

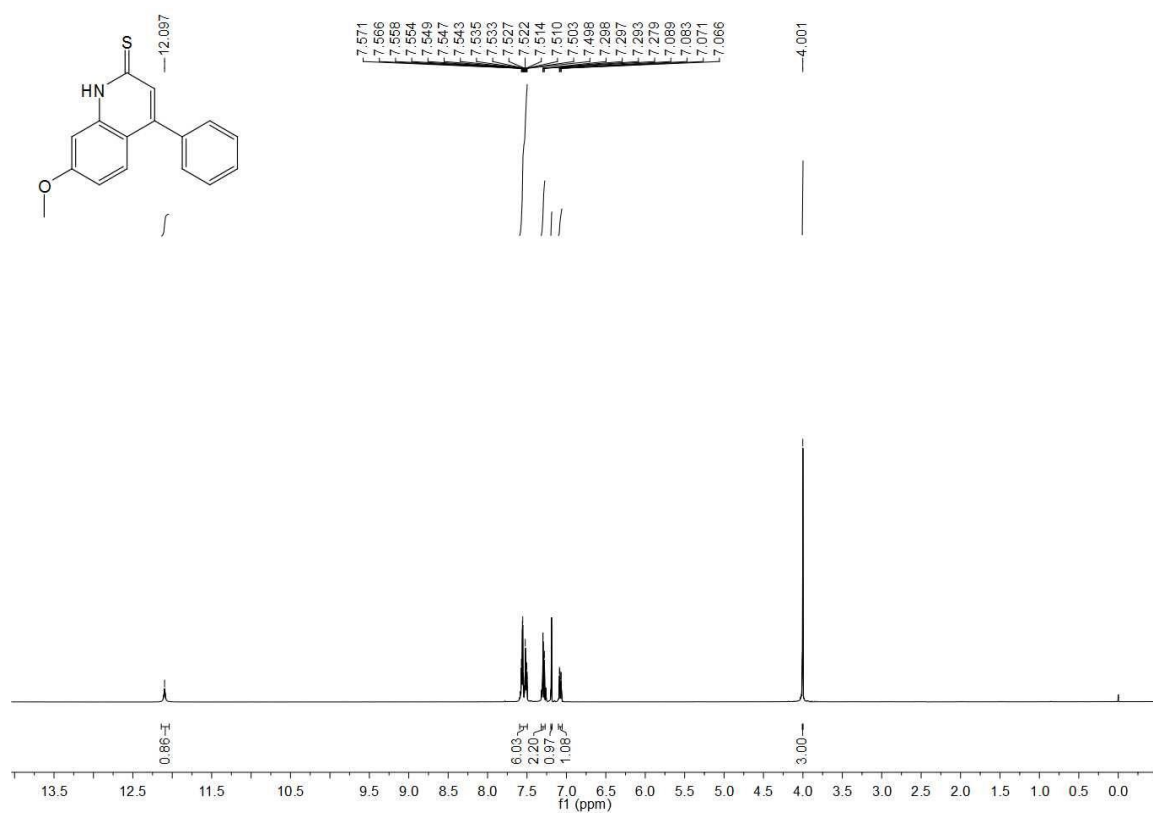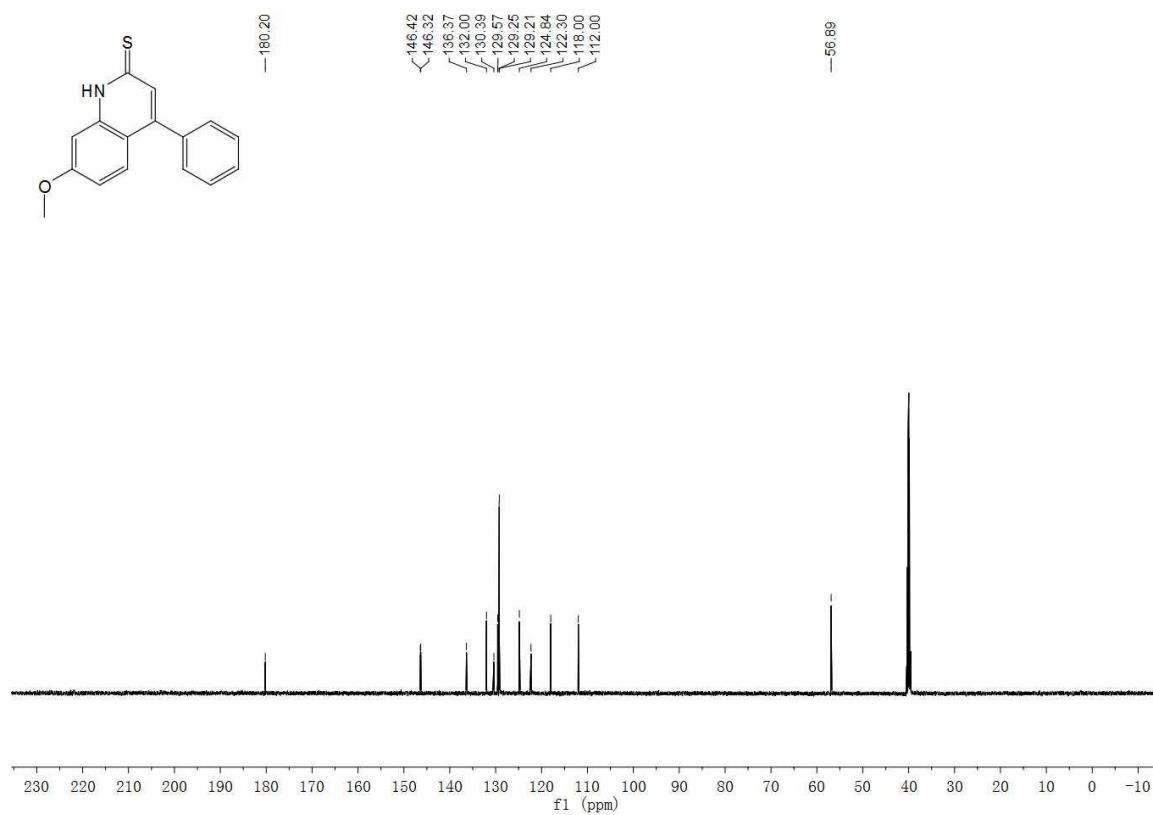



Copies of NMR of compound **2g**.

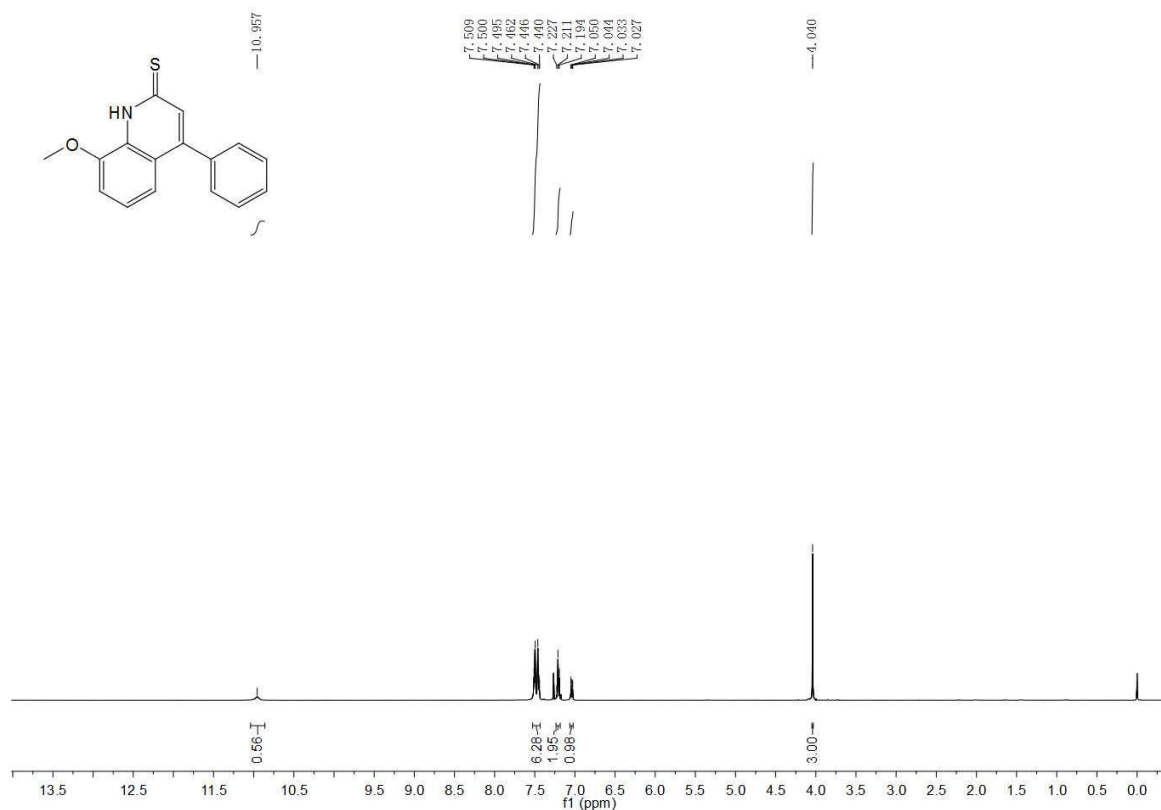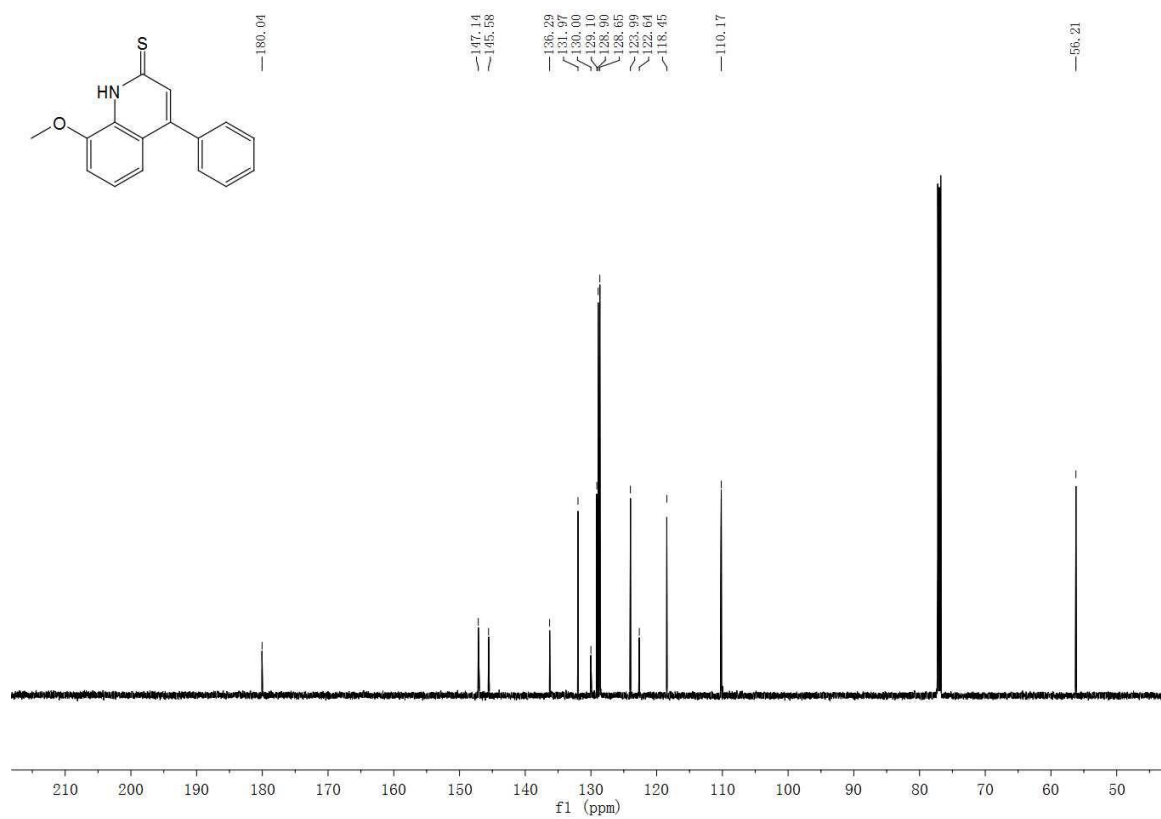

Copies of NMR of compound **2h**.

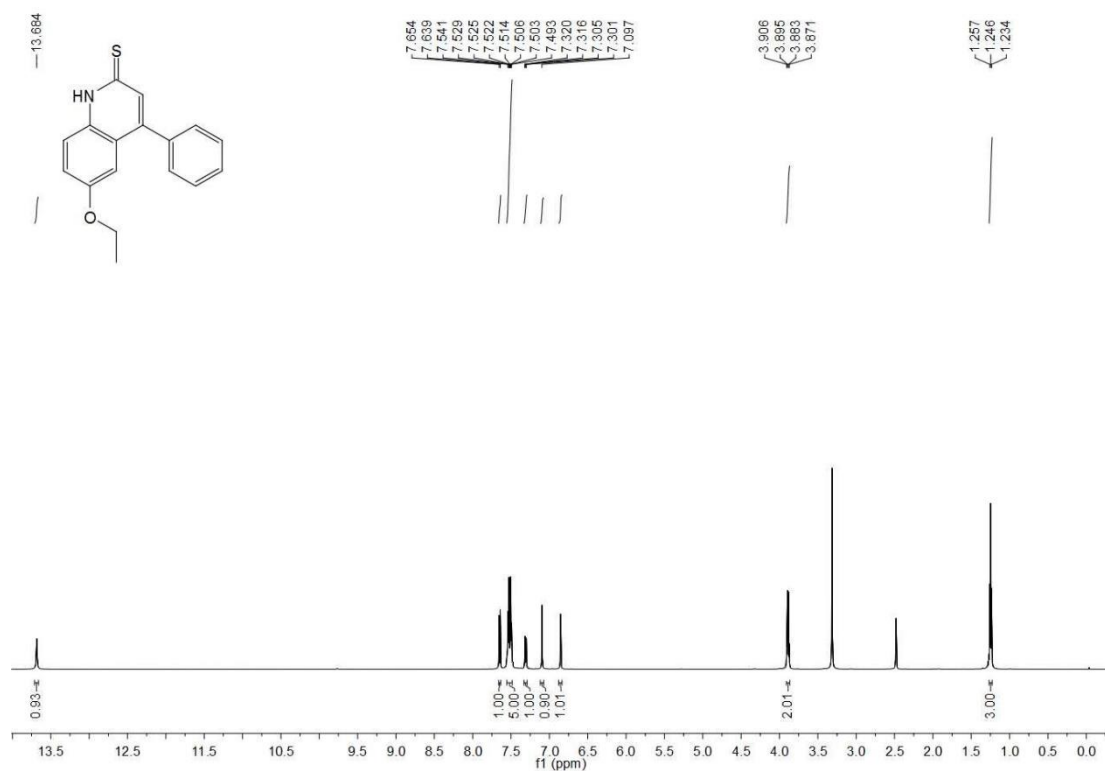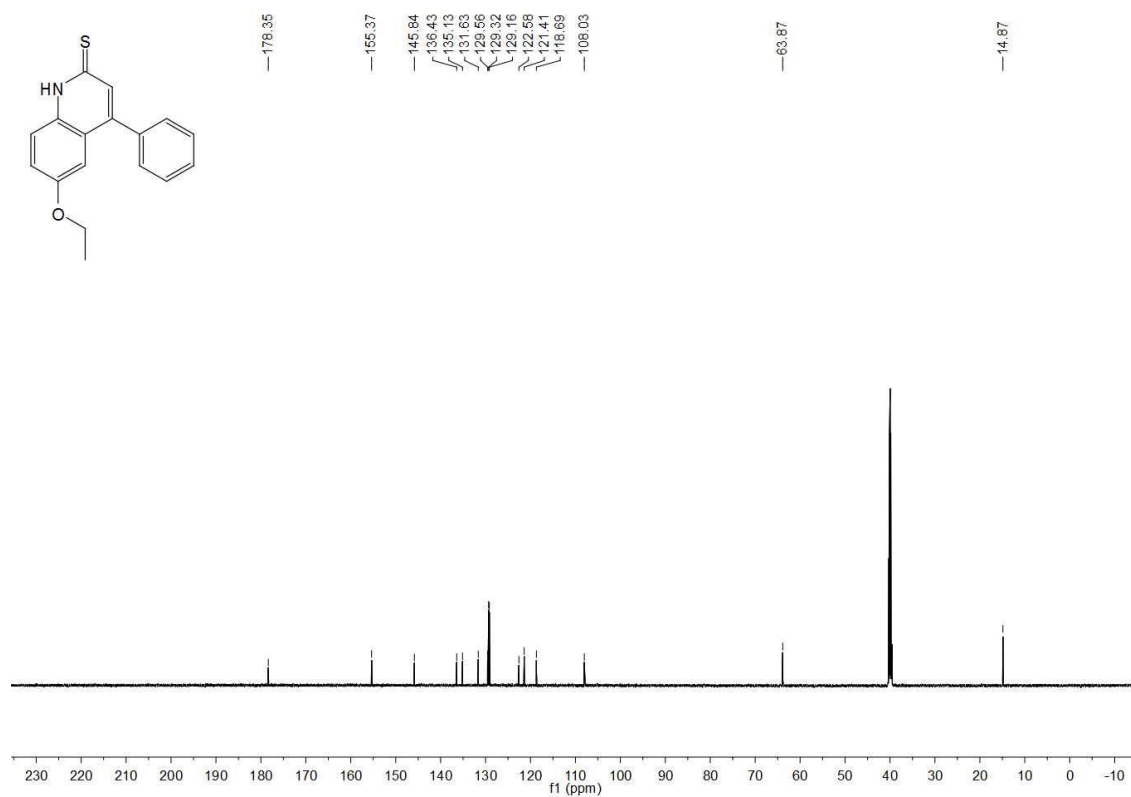

Copies of NMR of compound **2i**.

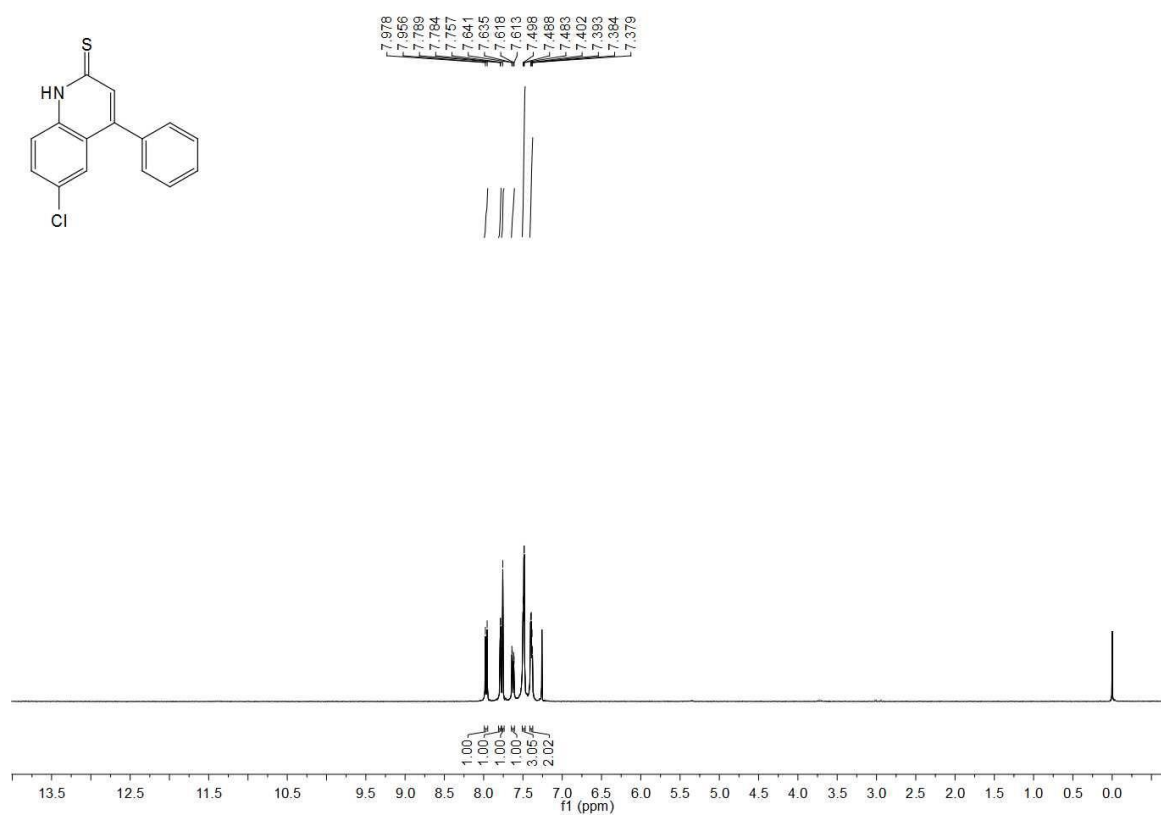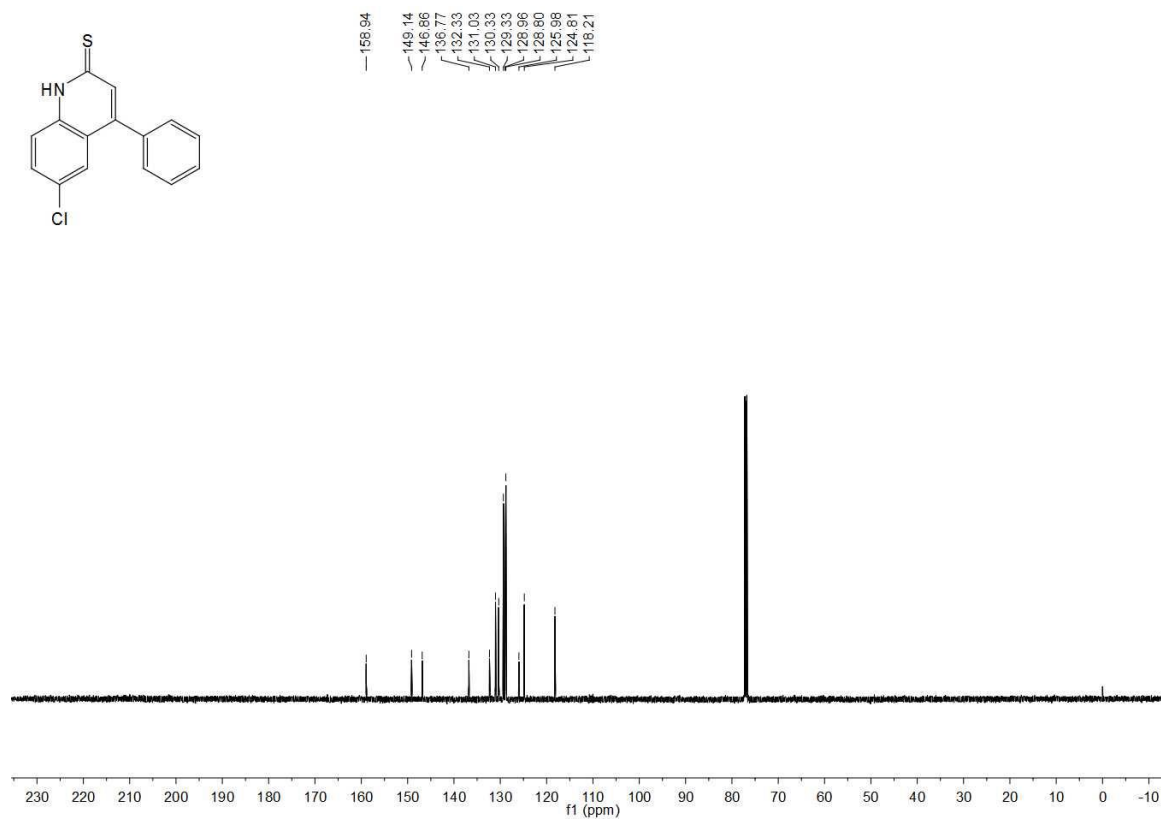

Copies of NMR of compound **2j**.

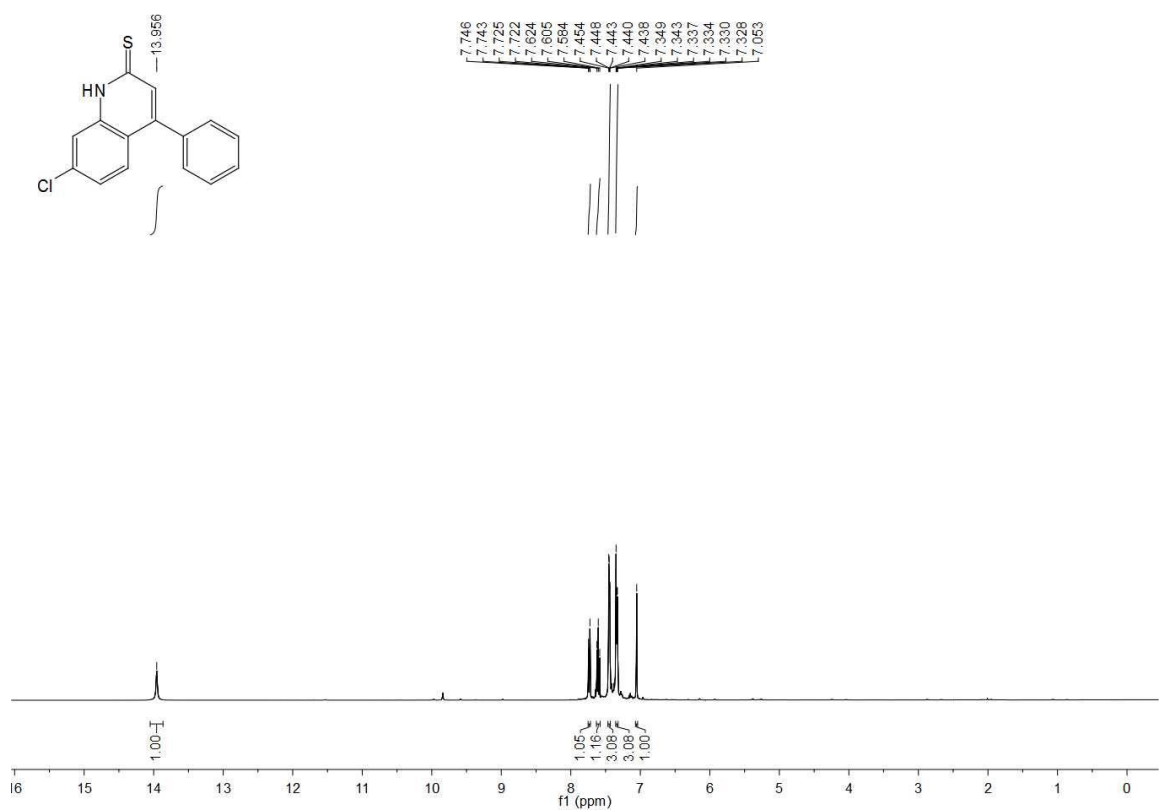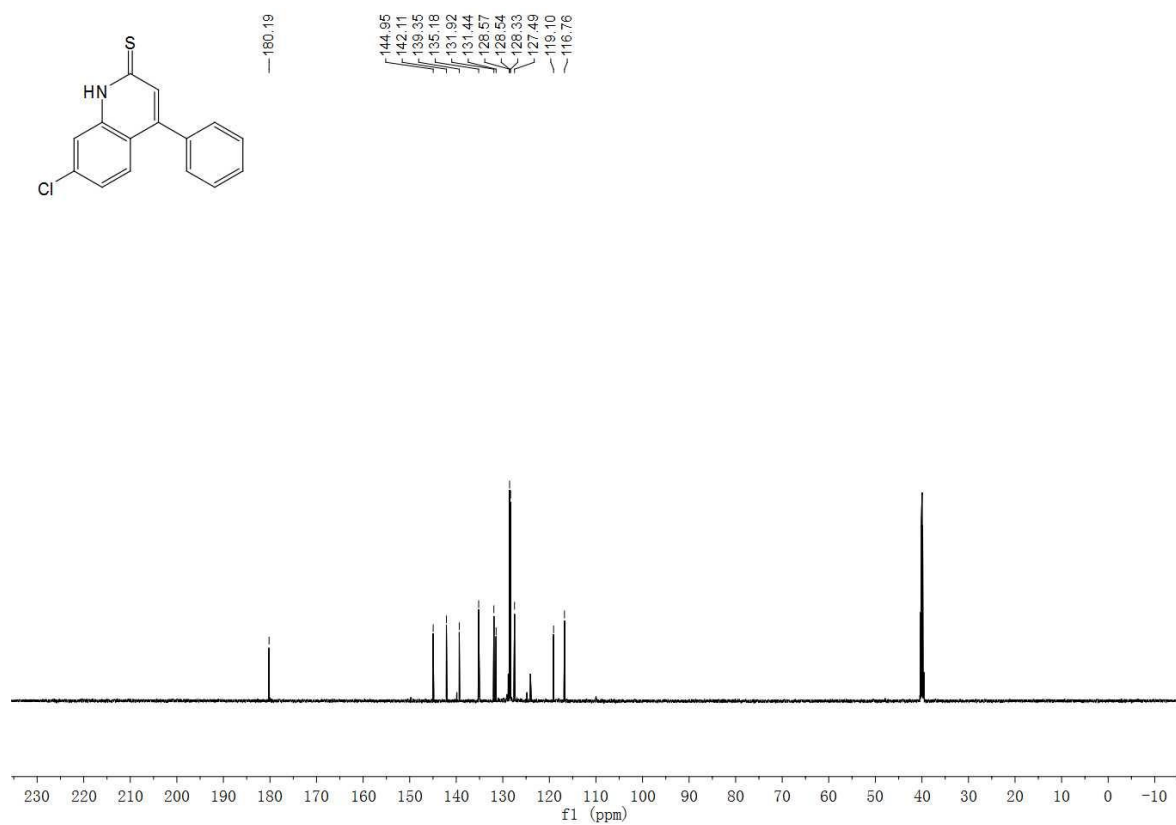

Copies of NMR of compound **2k**.

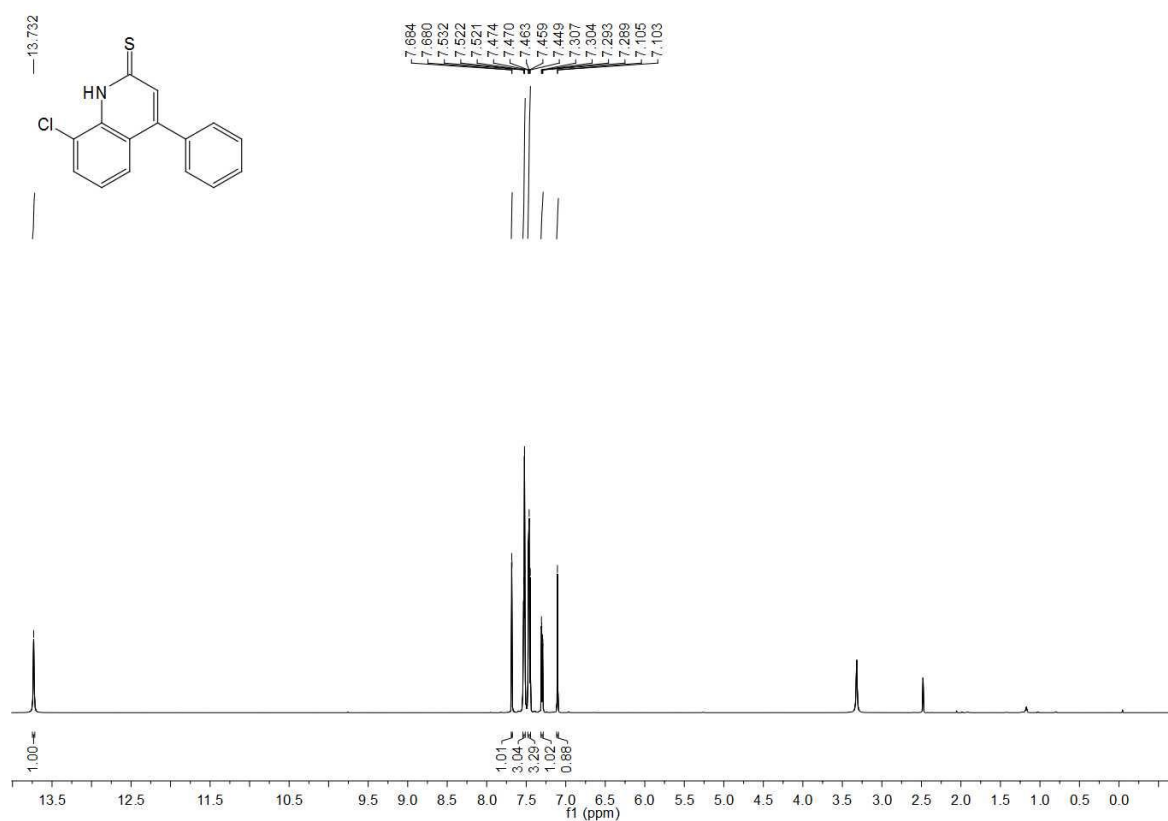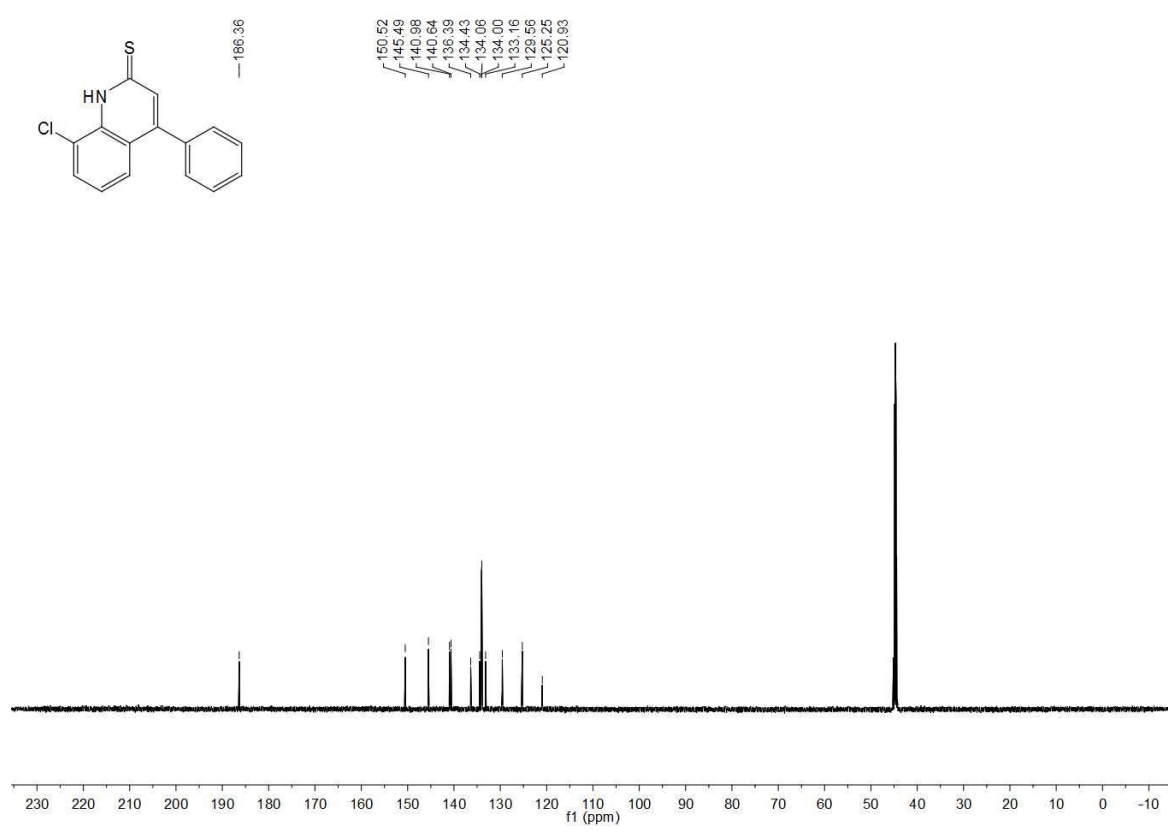

Copies of NMR of compound **2l**.

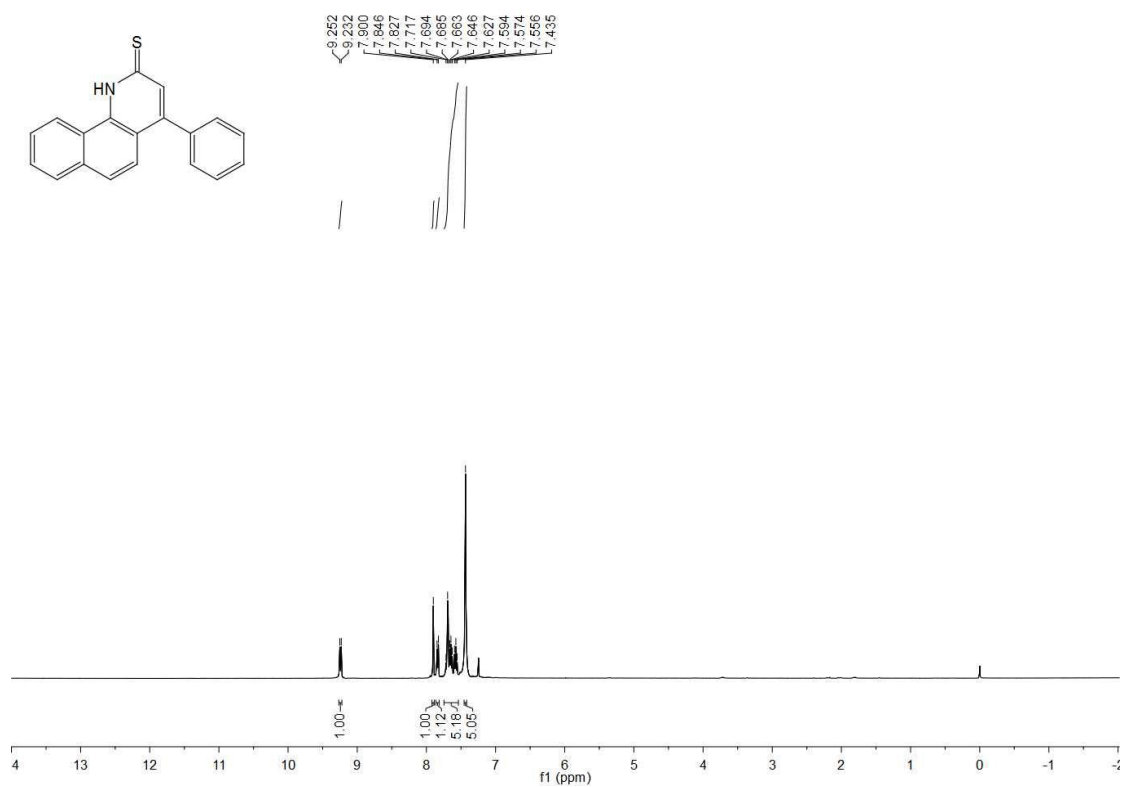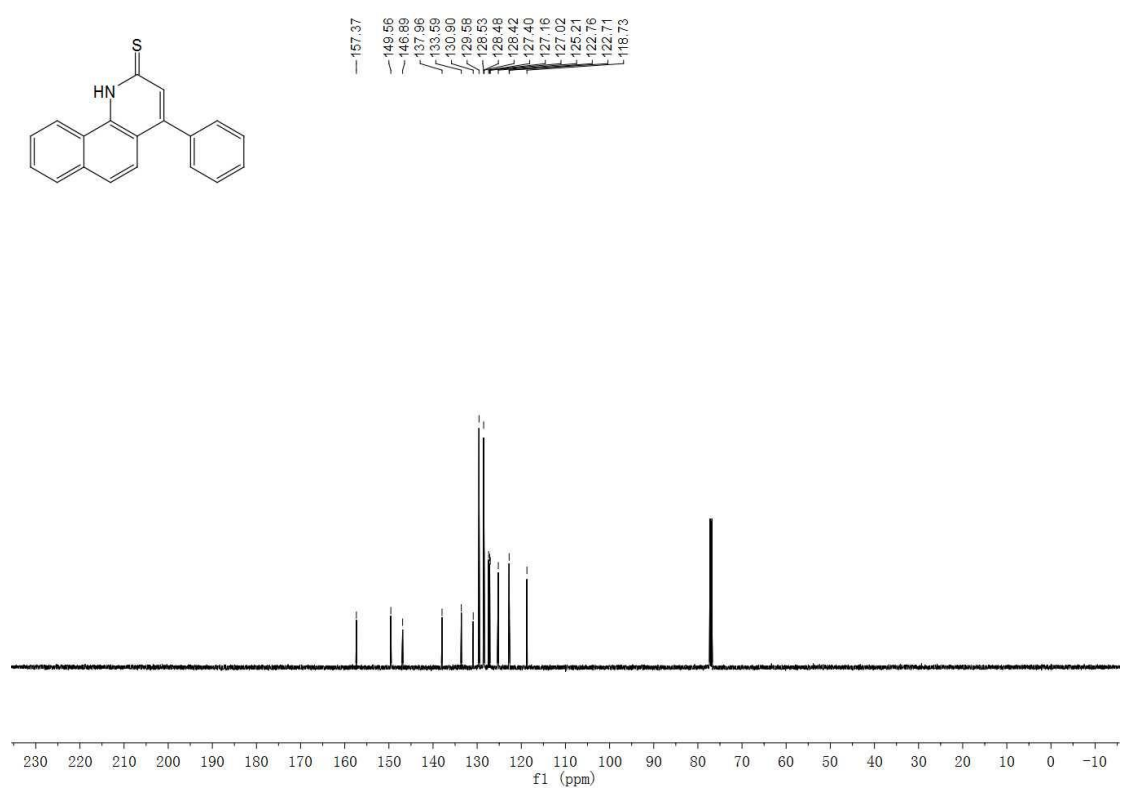

Copies of NMR of compound **2m**.

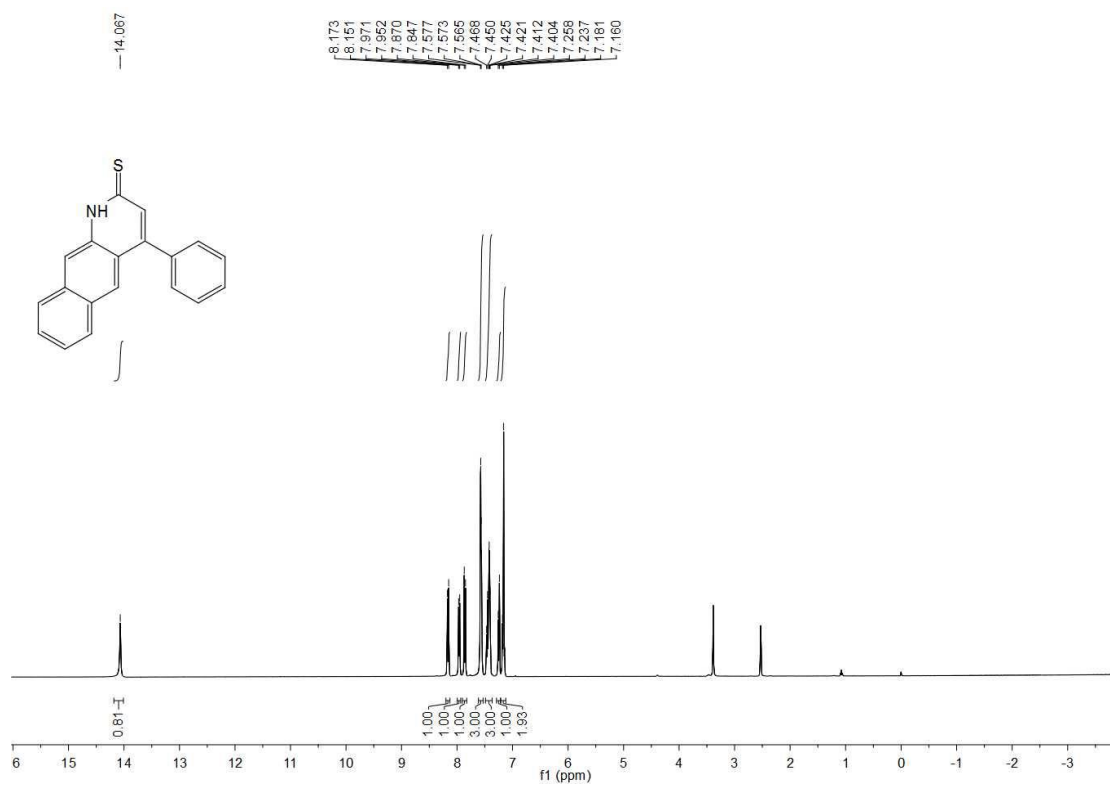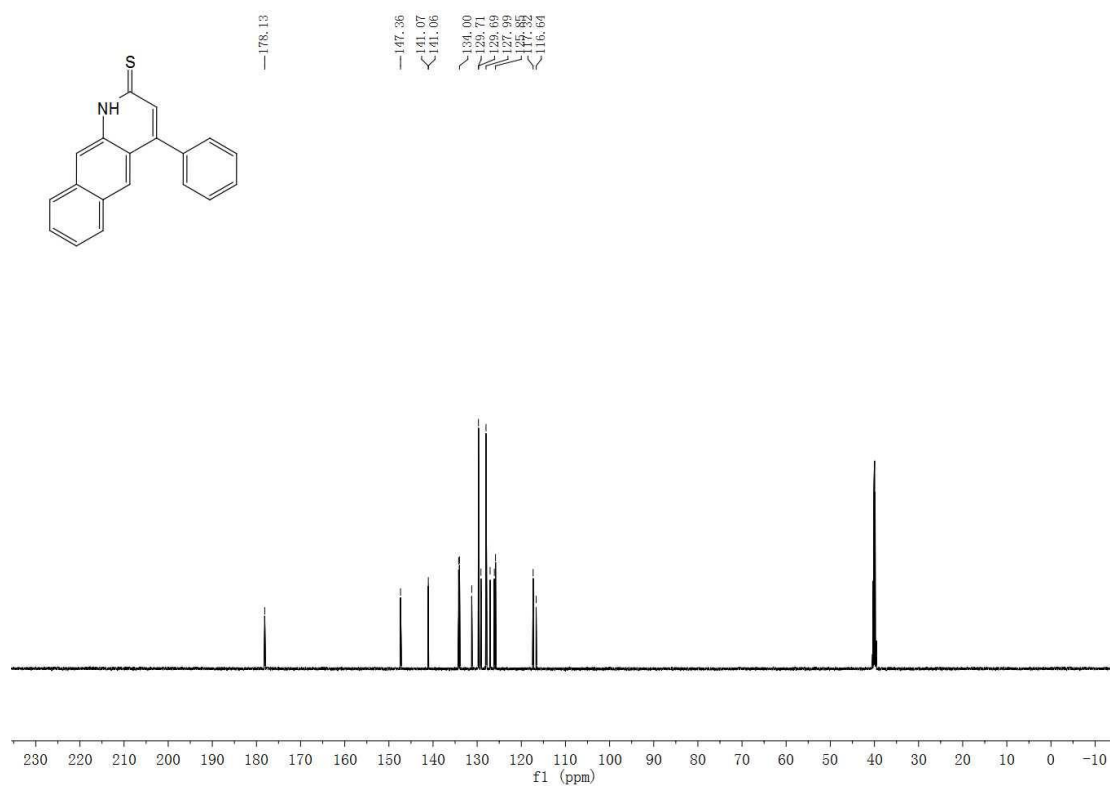

Copies of NMR of compound **2n**.

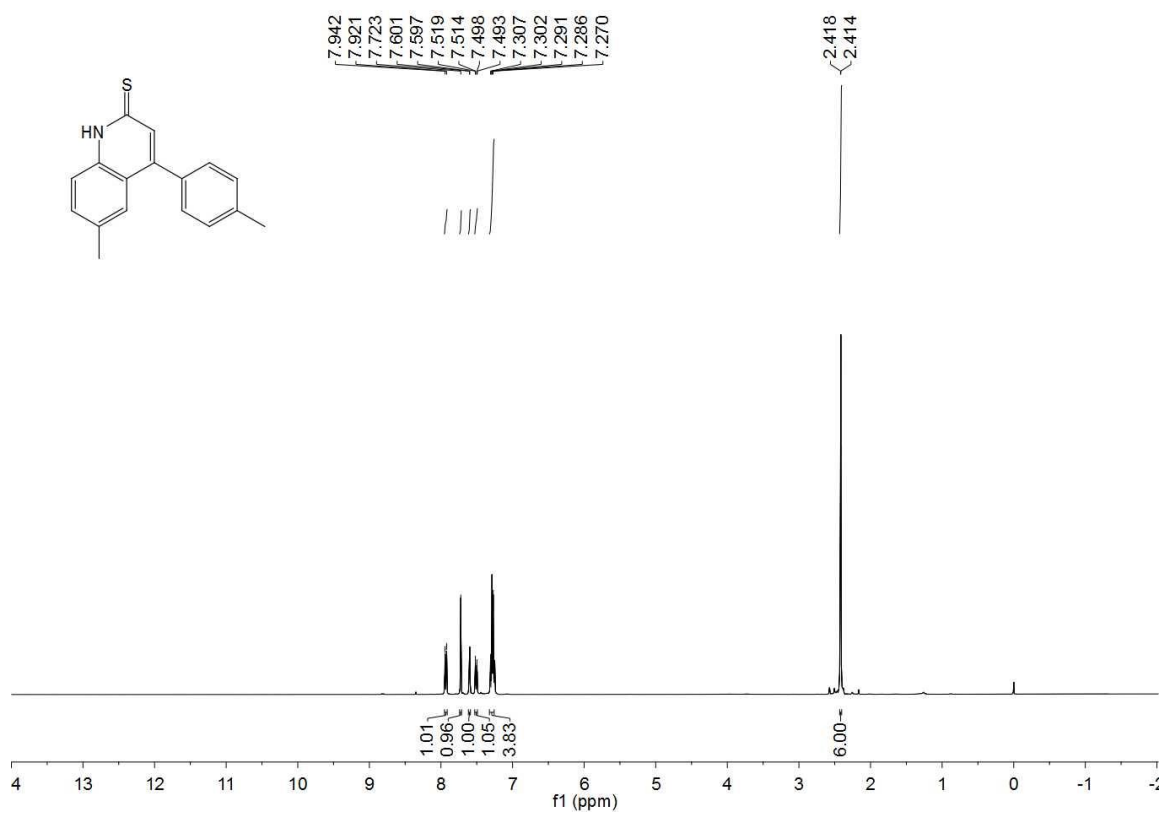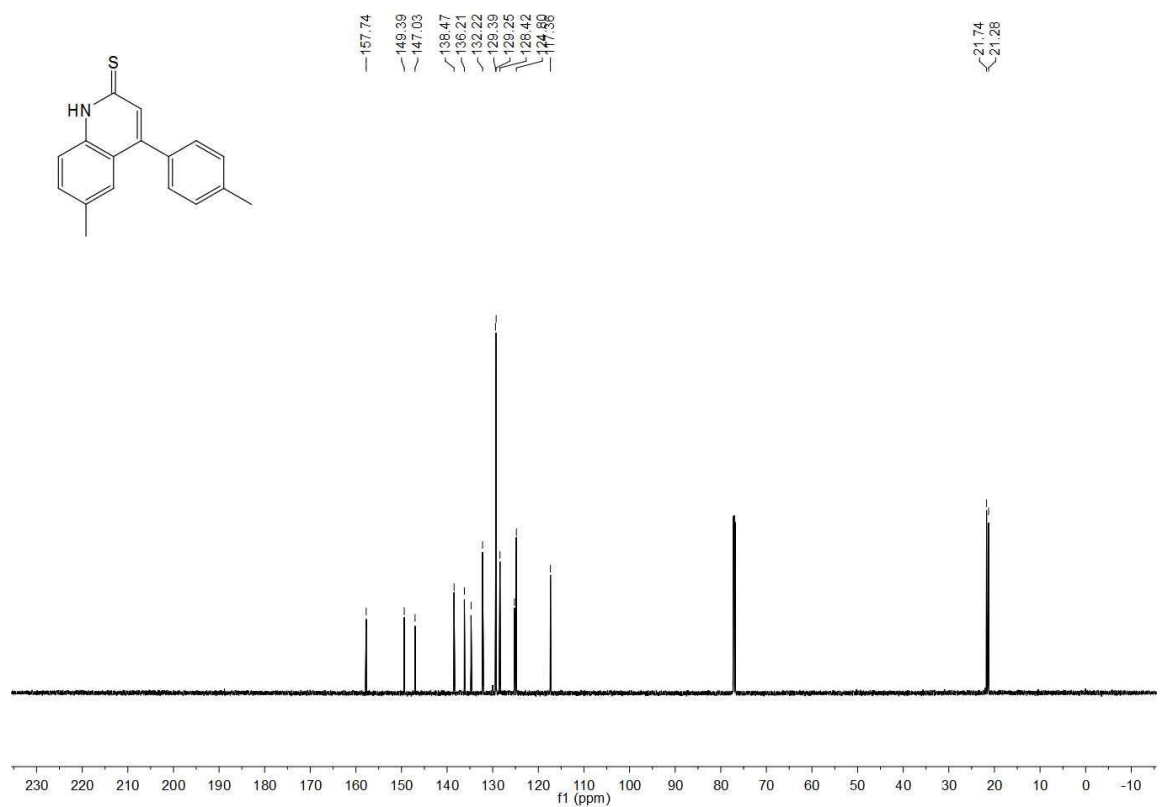



Copies of NMR of compound **20**.

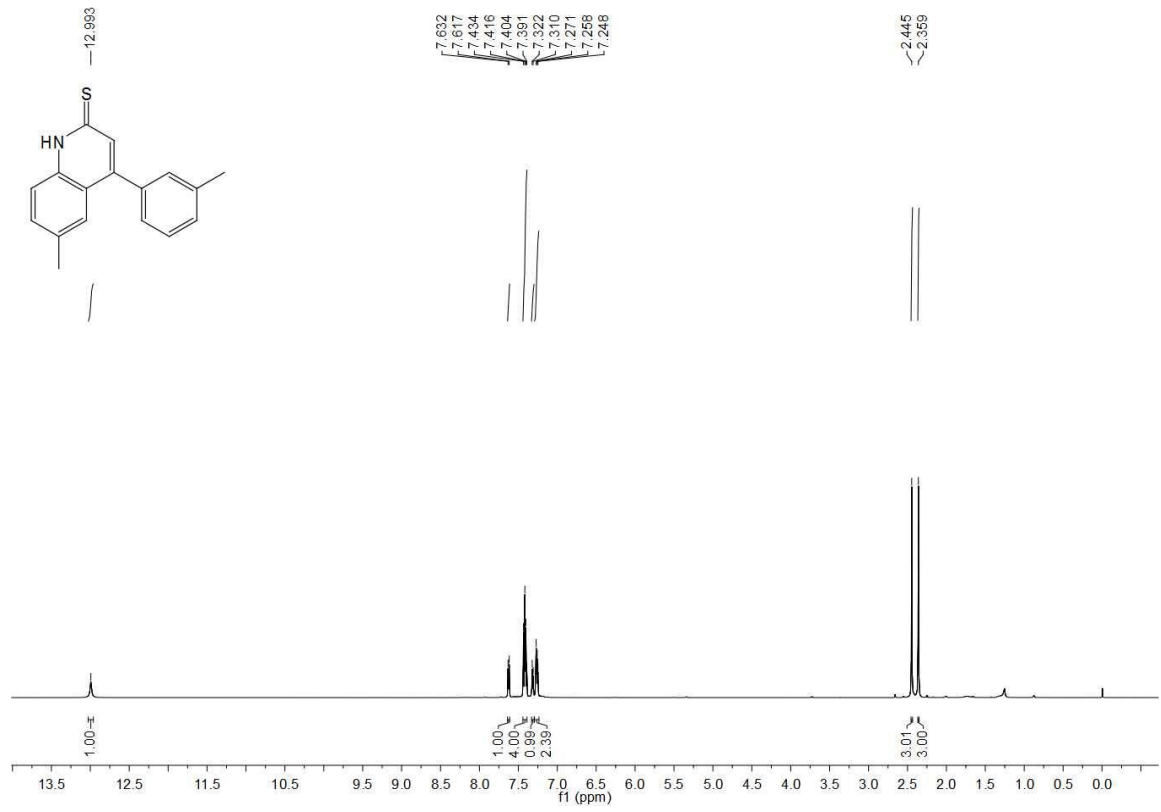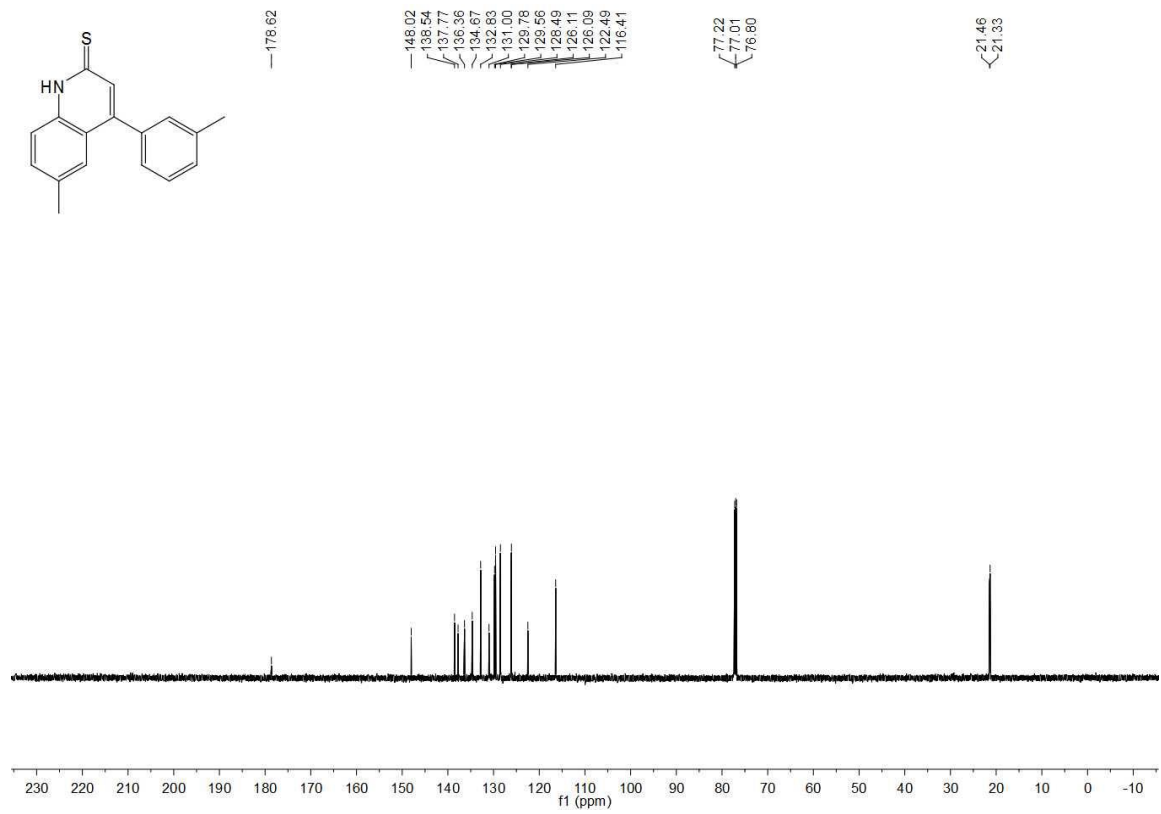

Copies of NMR of compound **2p**.

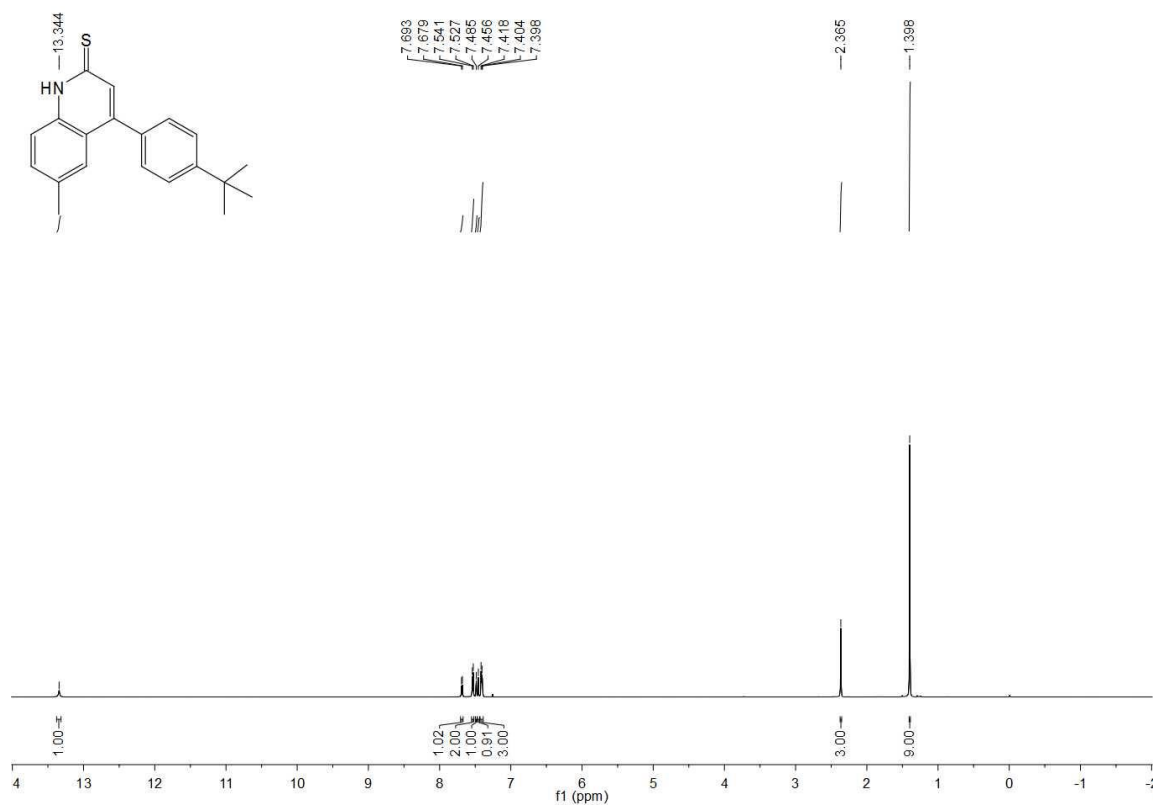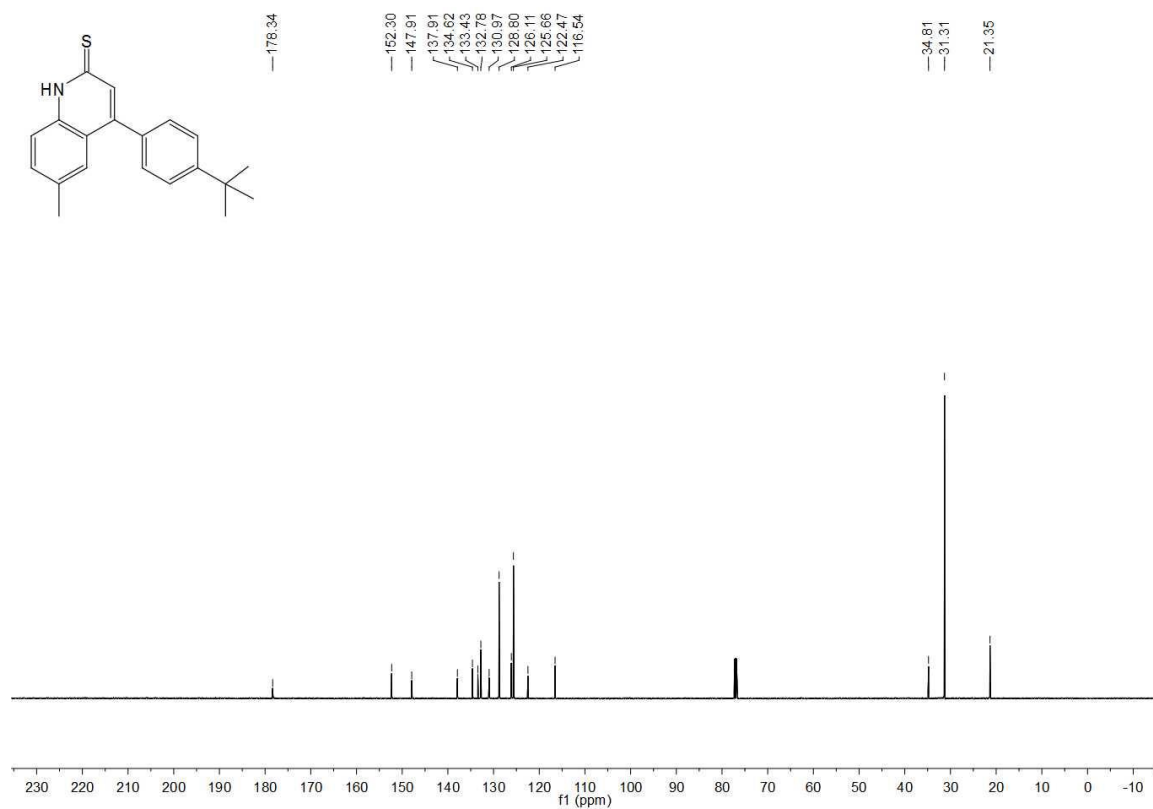

Copies of NMR of compound **2q**.

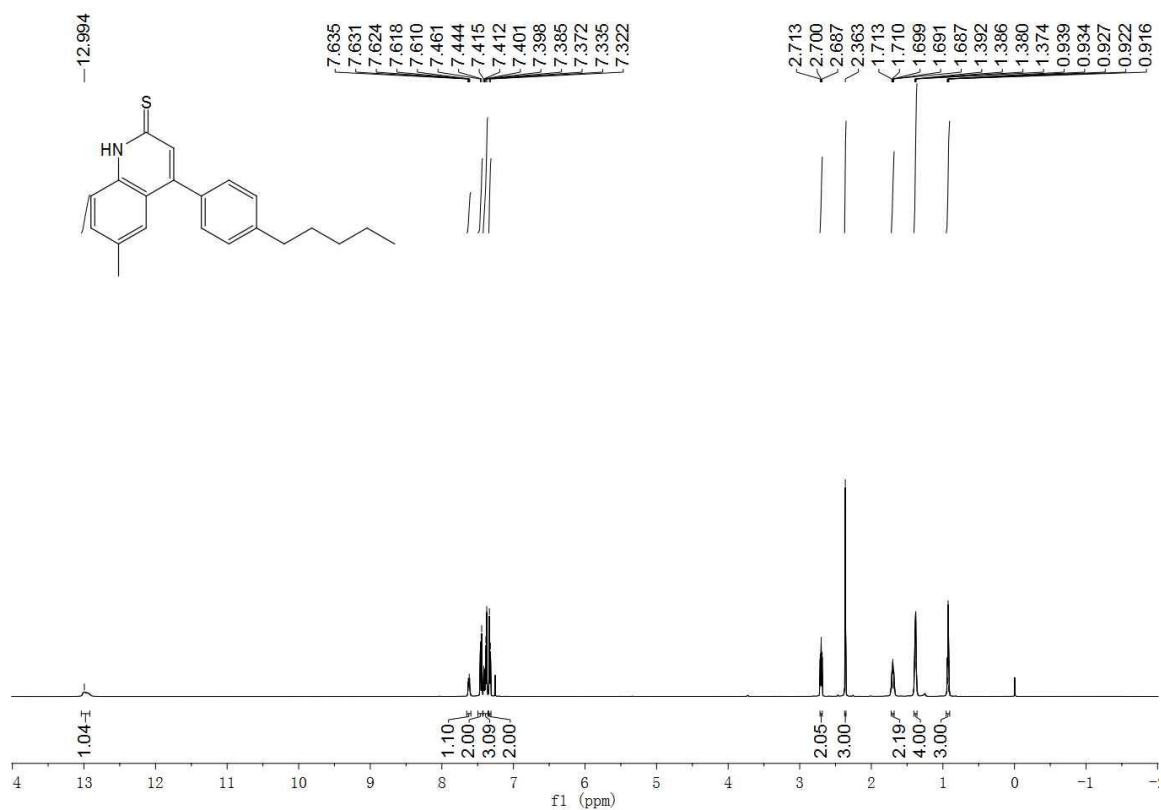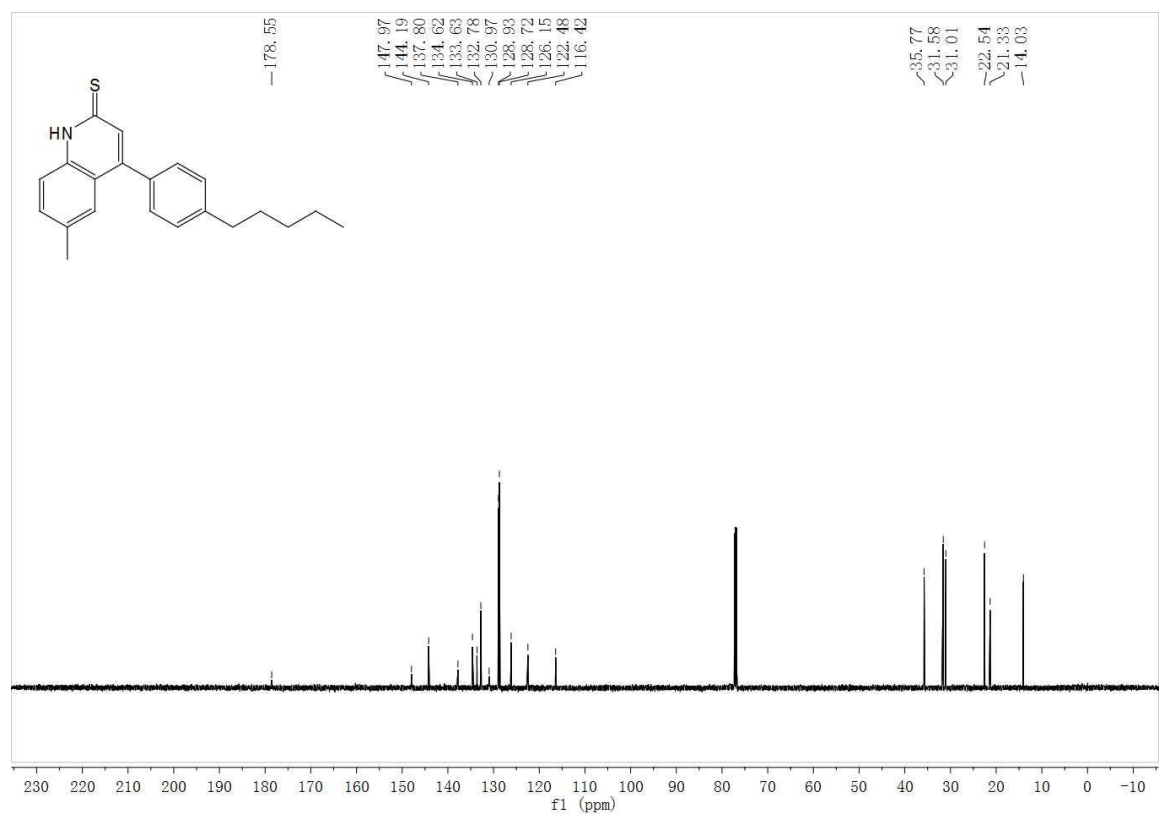

Copies of NMR of compound **2r**.

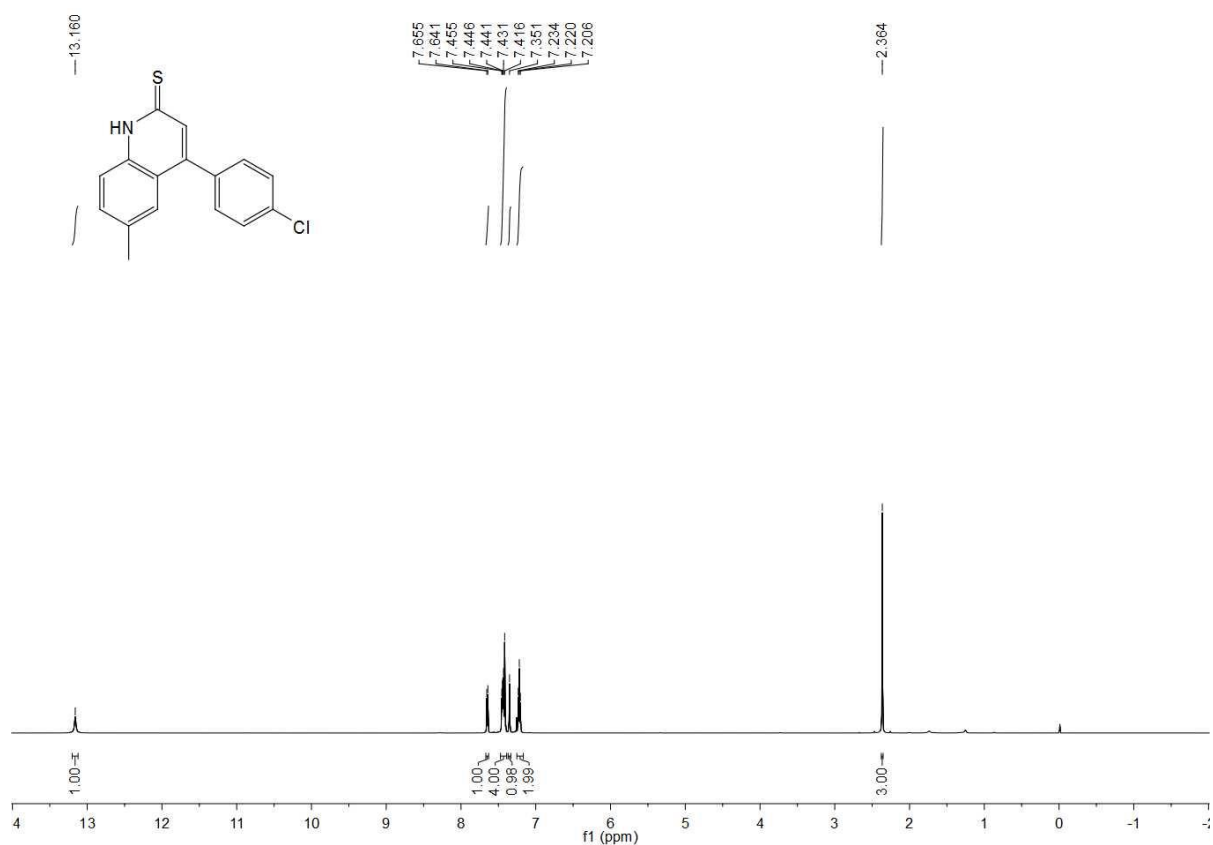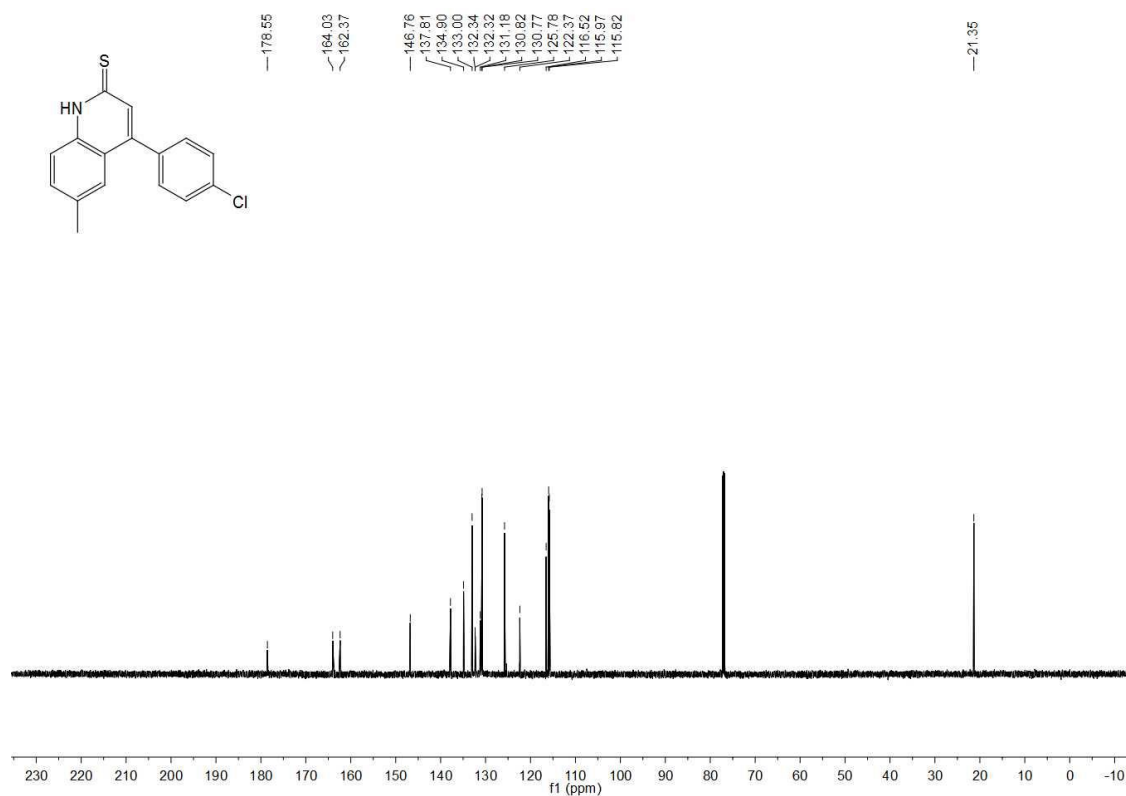

Copies of NMR of compound **2s**.

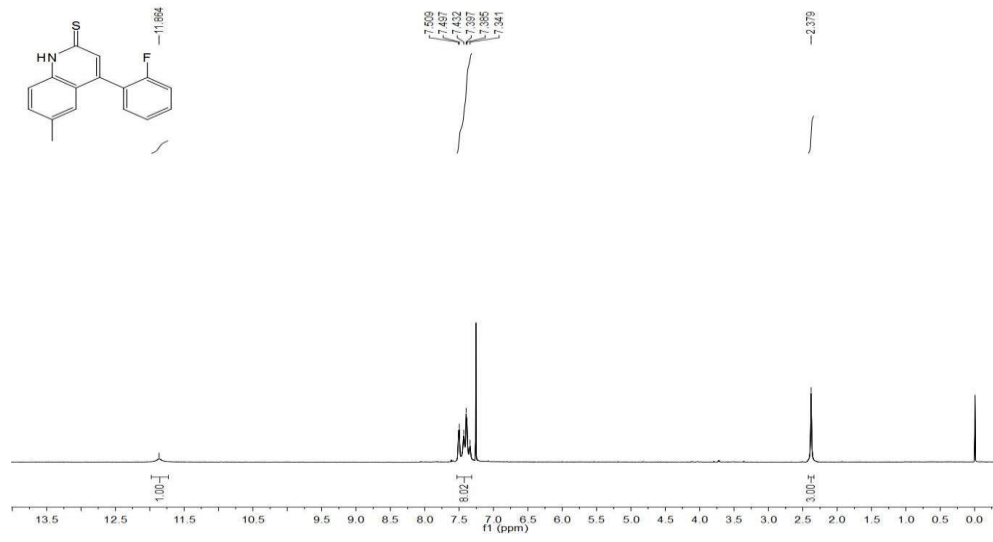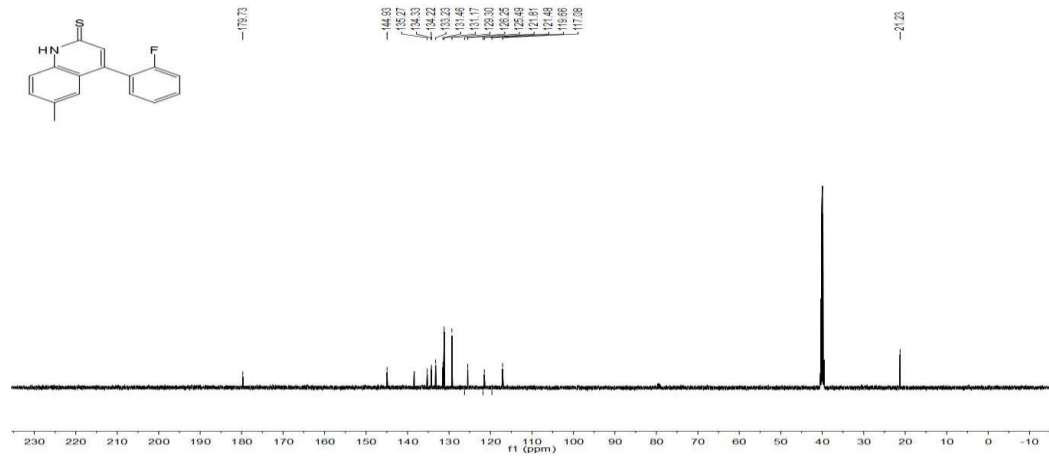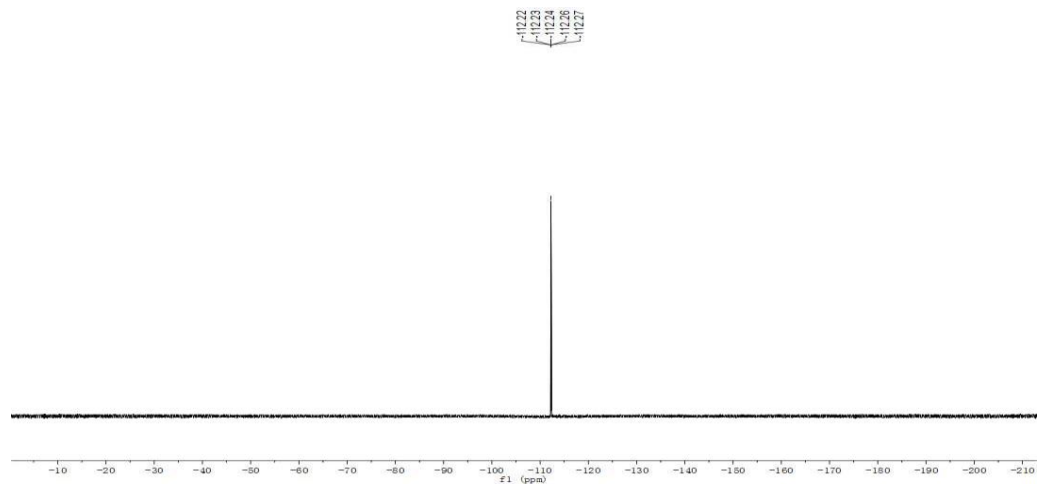

Copies of NMR of compound **2t**.

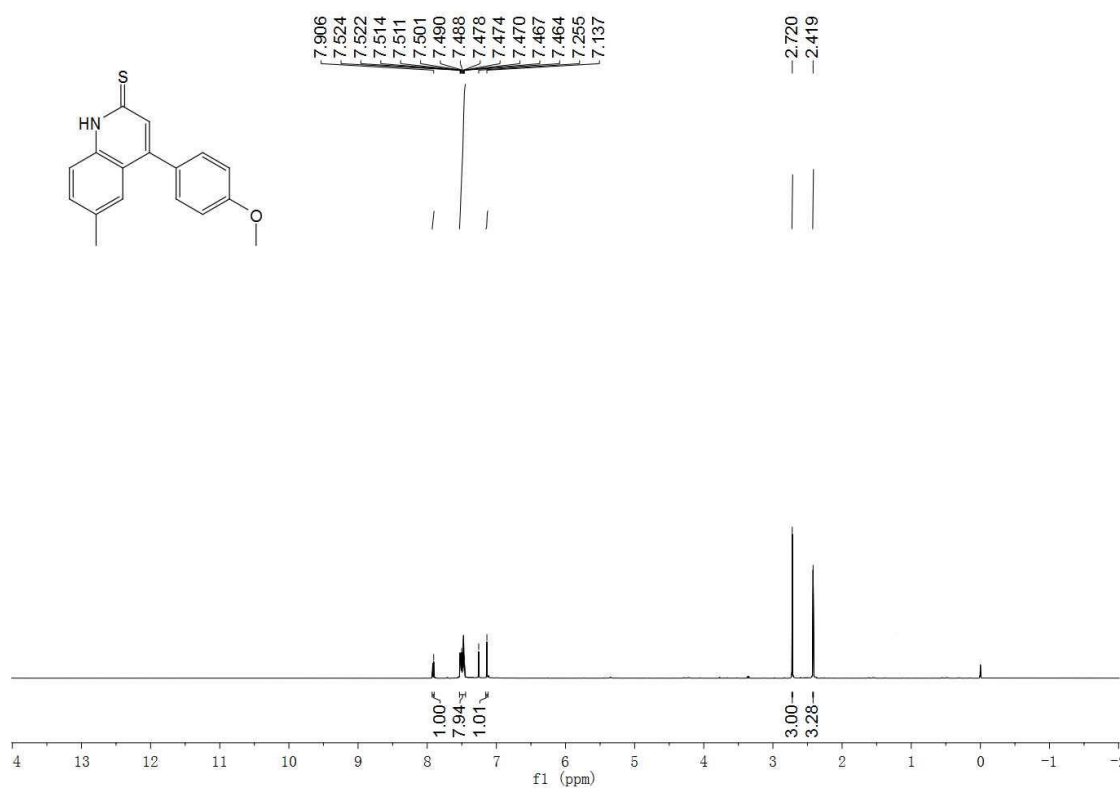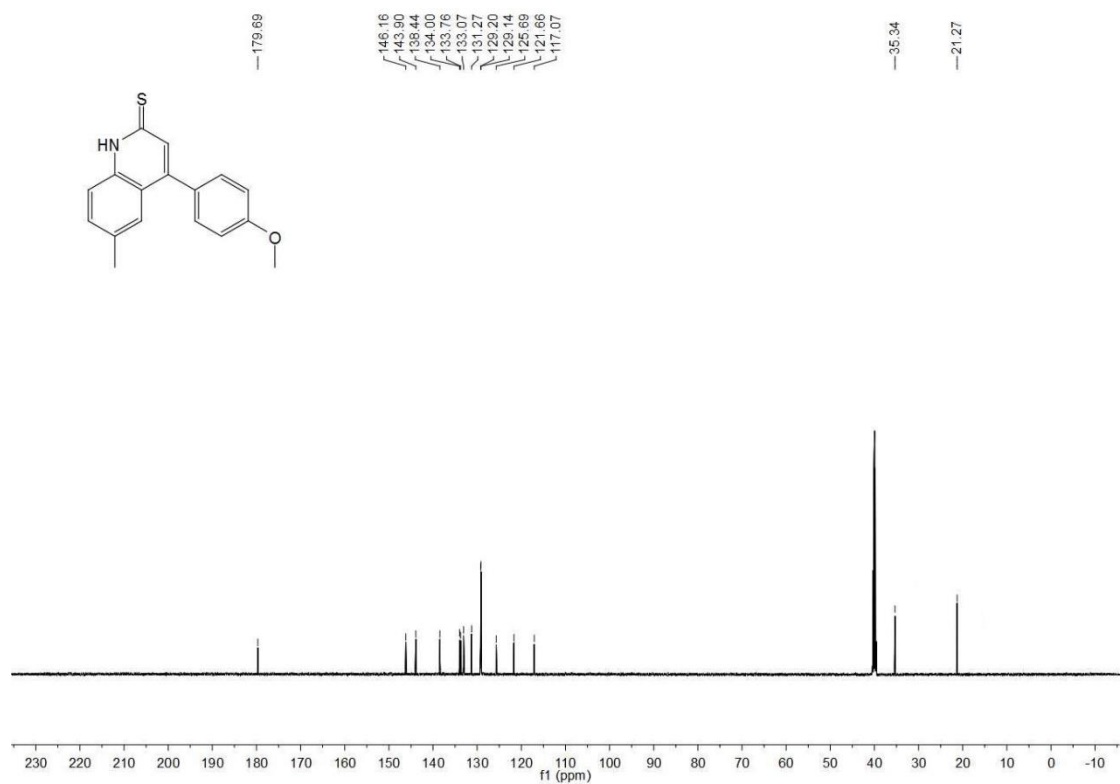

Copies of NMR of compound **2u**.

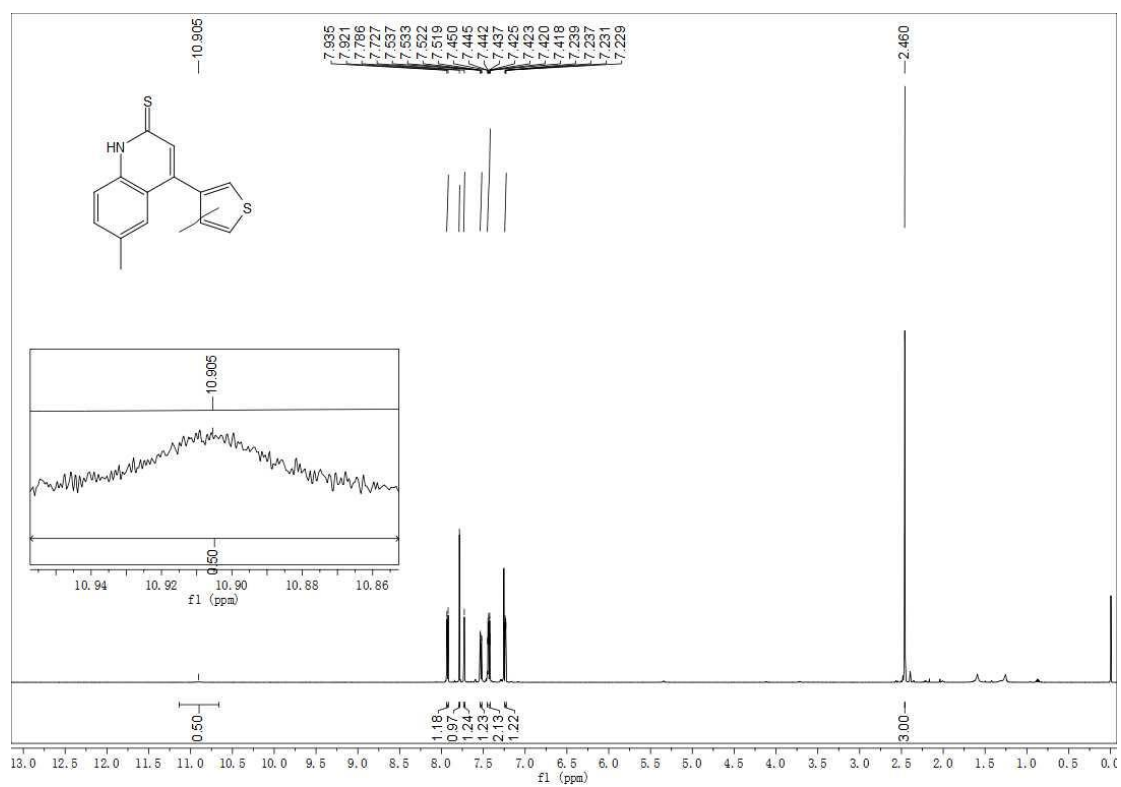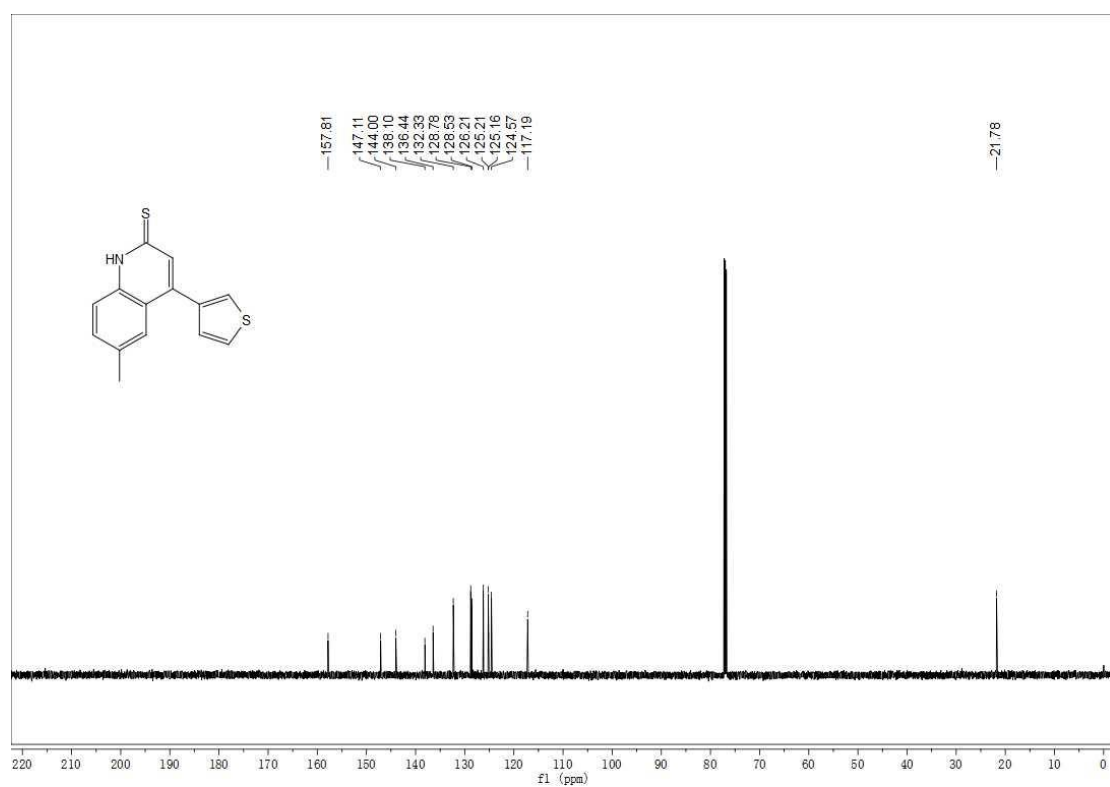

Copies of NMR of compound **2v**.

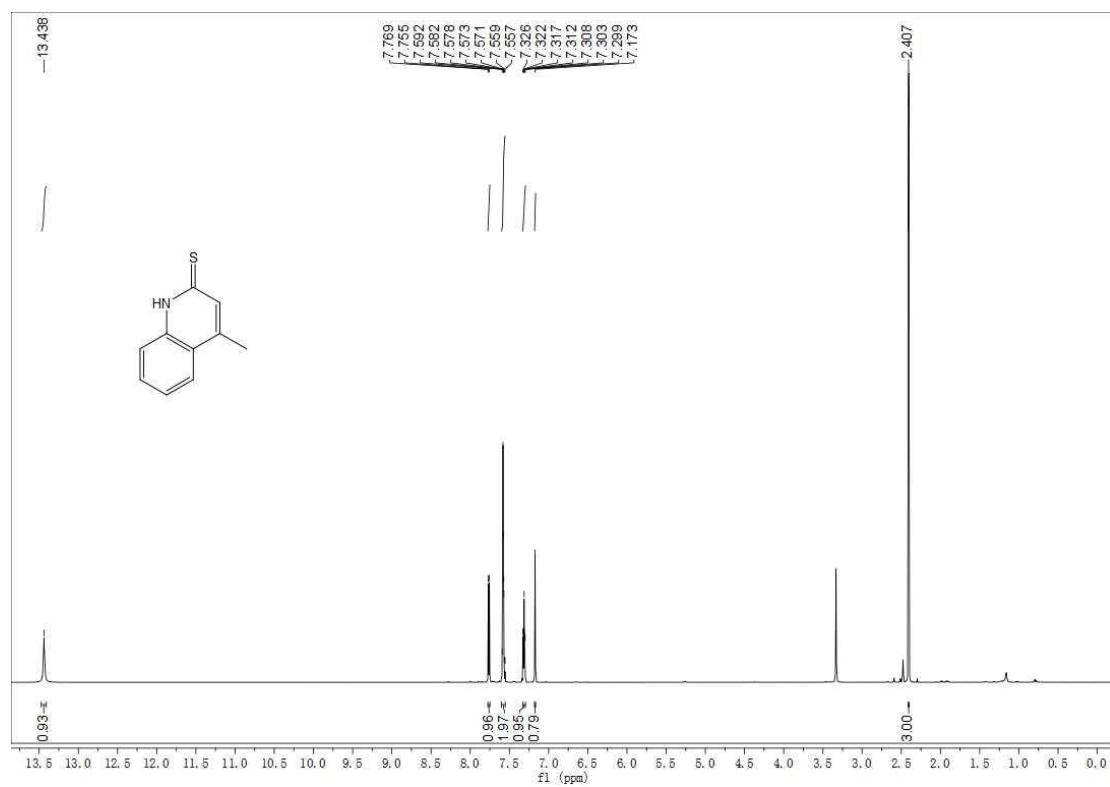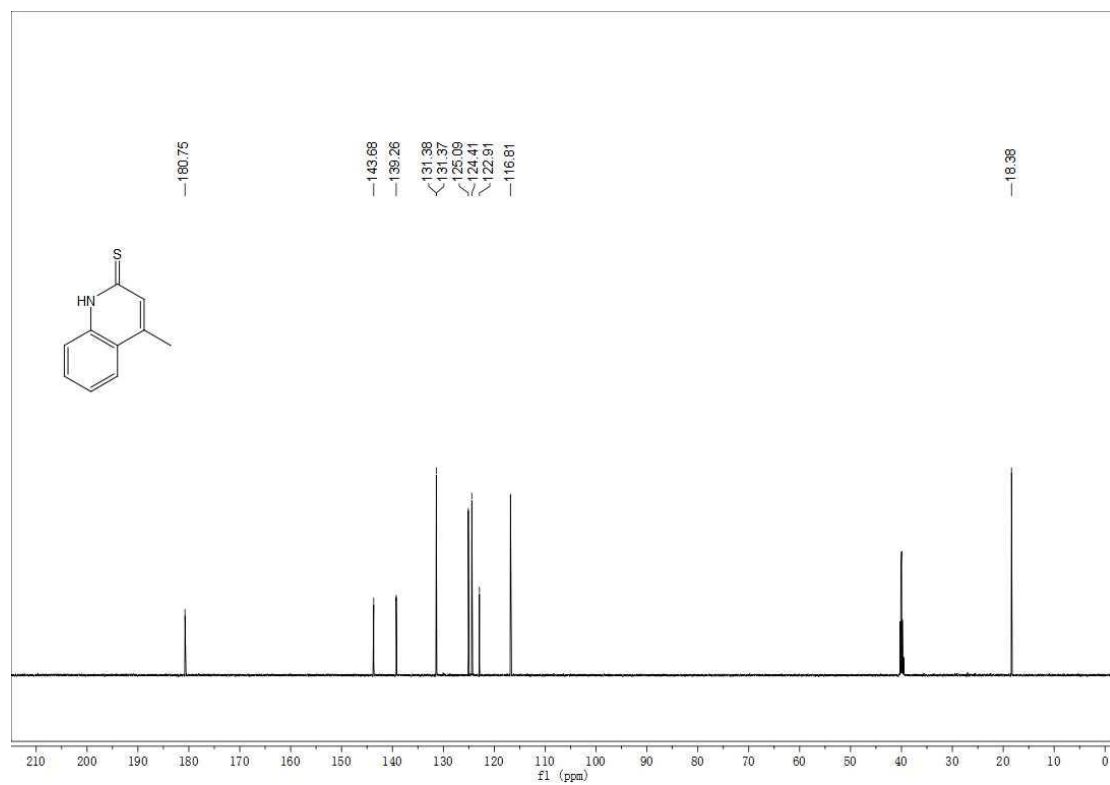



Copies of NMR of compound **3**.

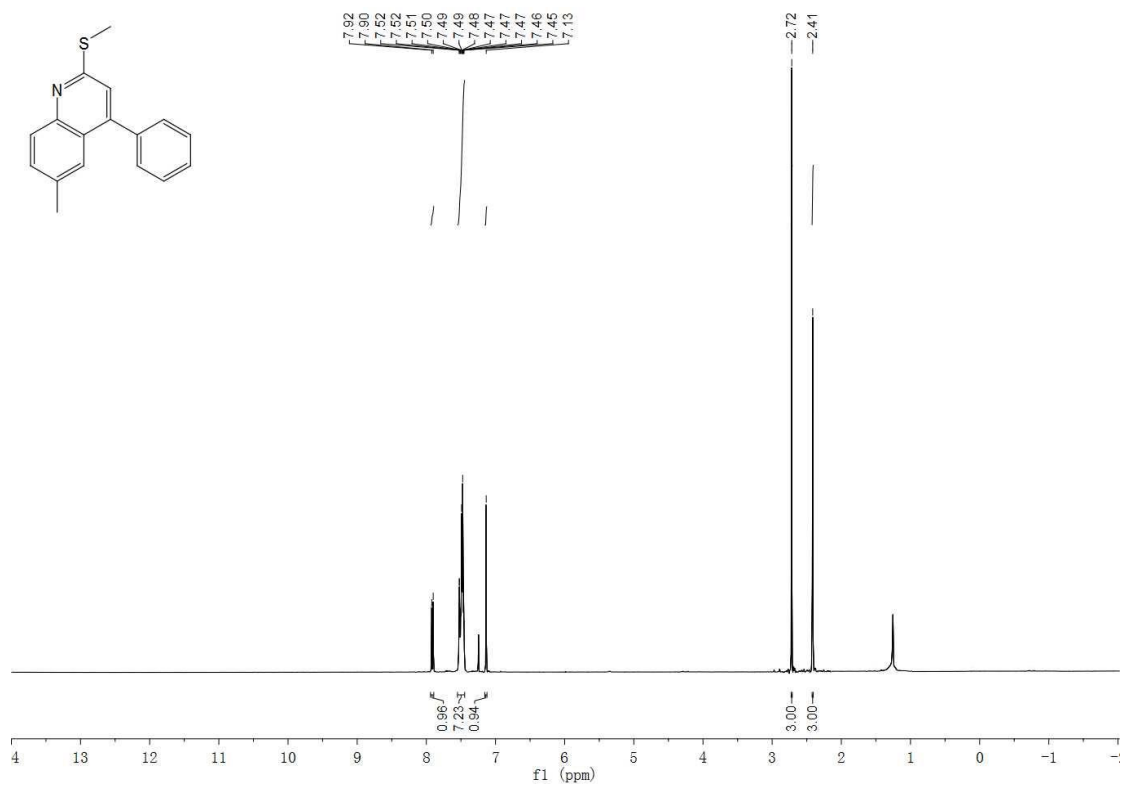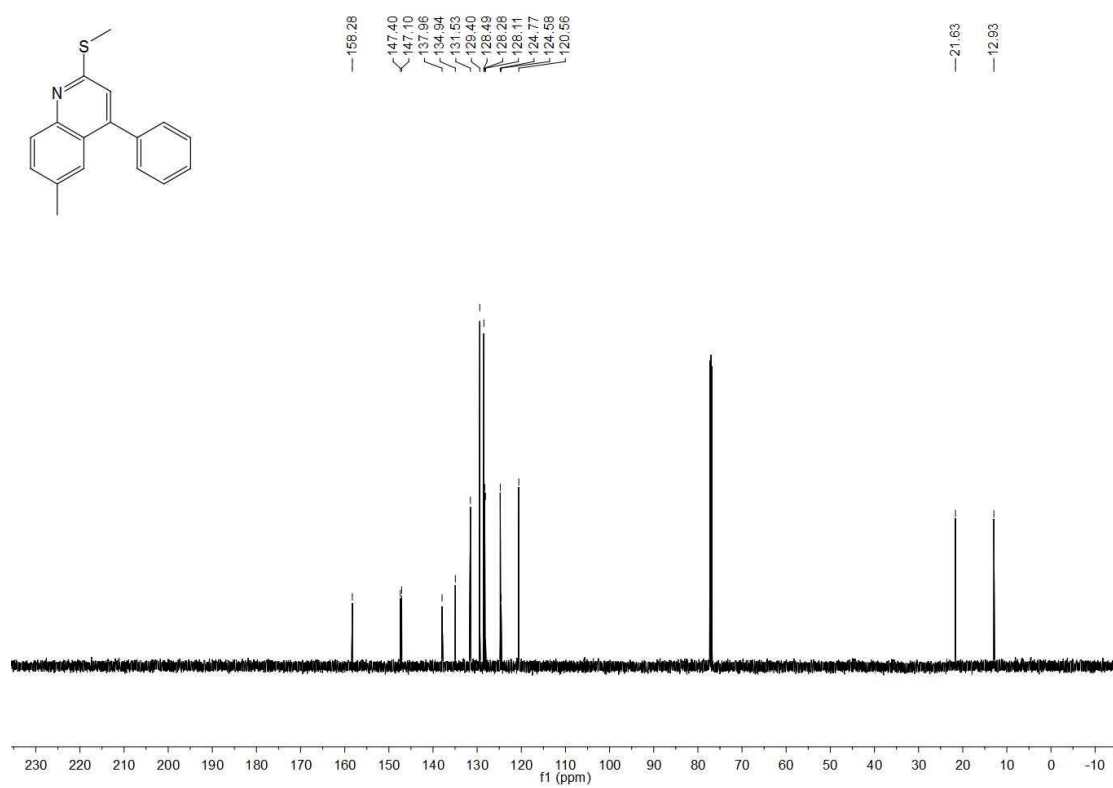

Copies of NMR of compound **4**.

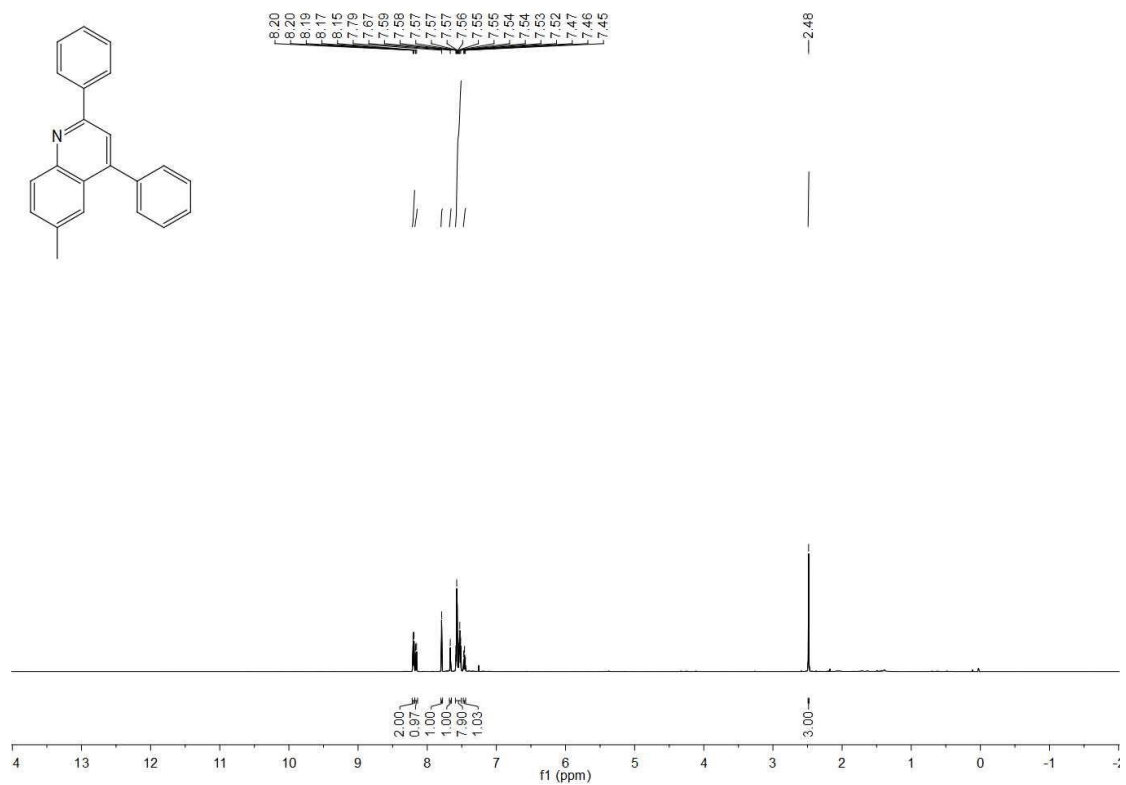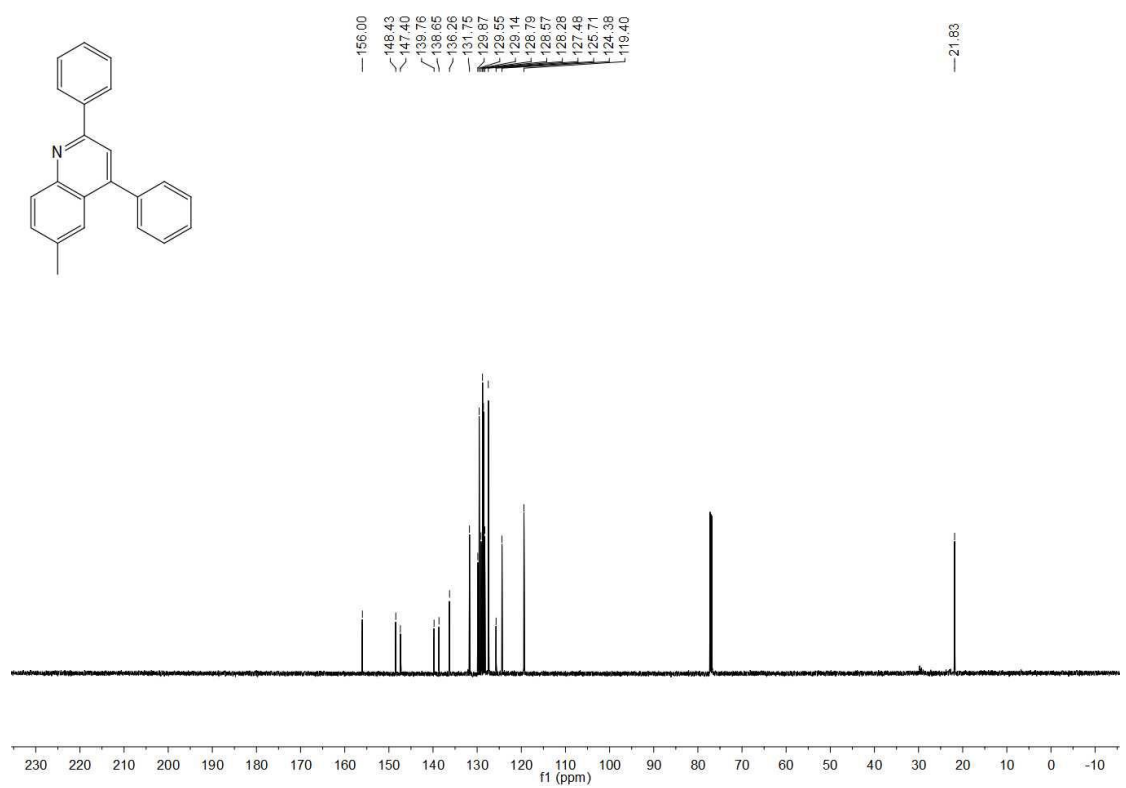

Copies of NMR of compound **5**.

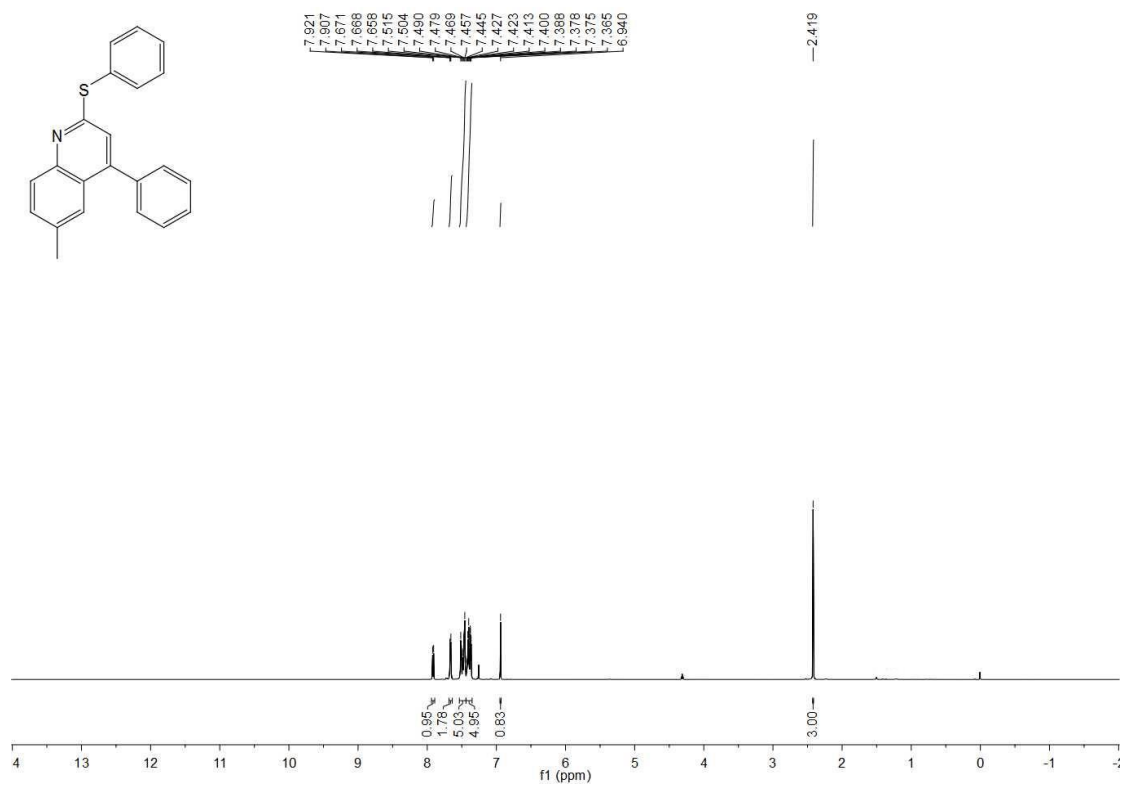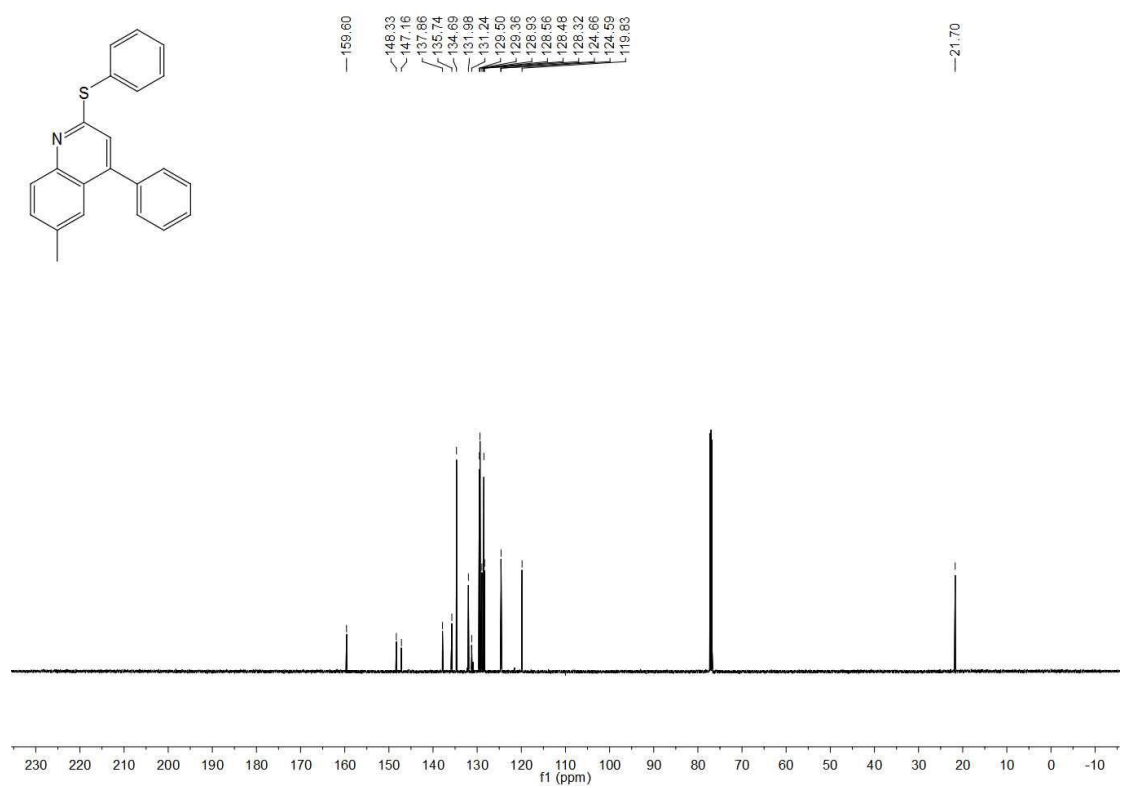

Copies of NMR of compound **6**.

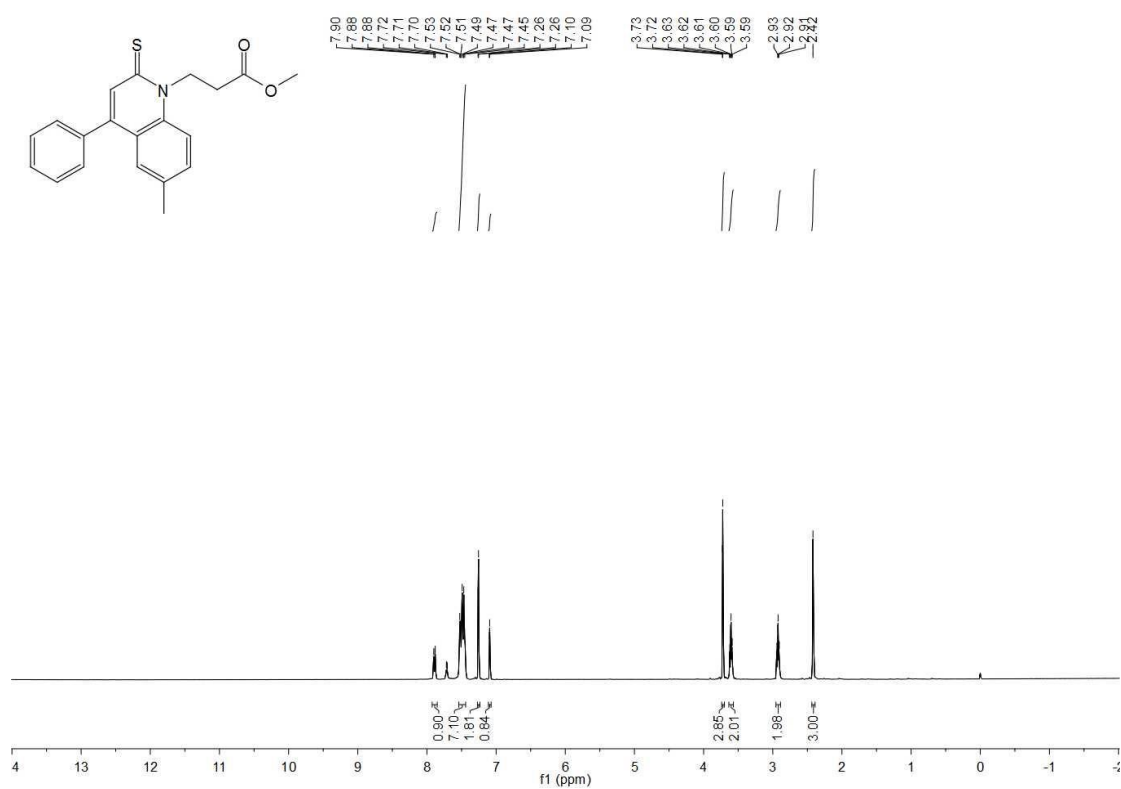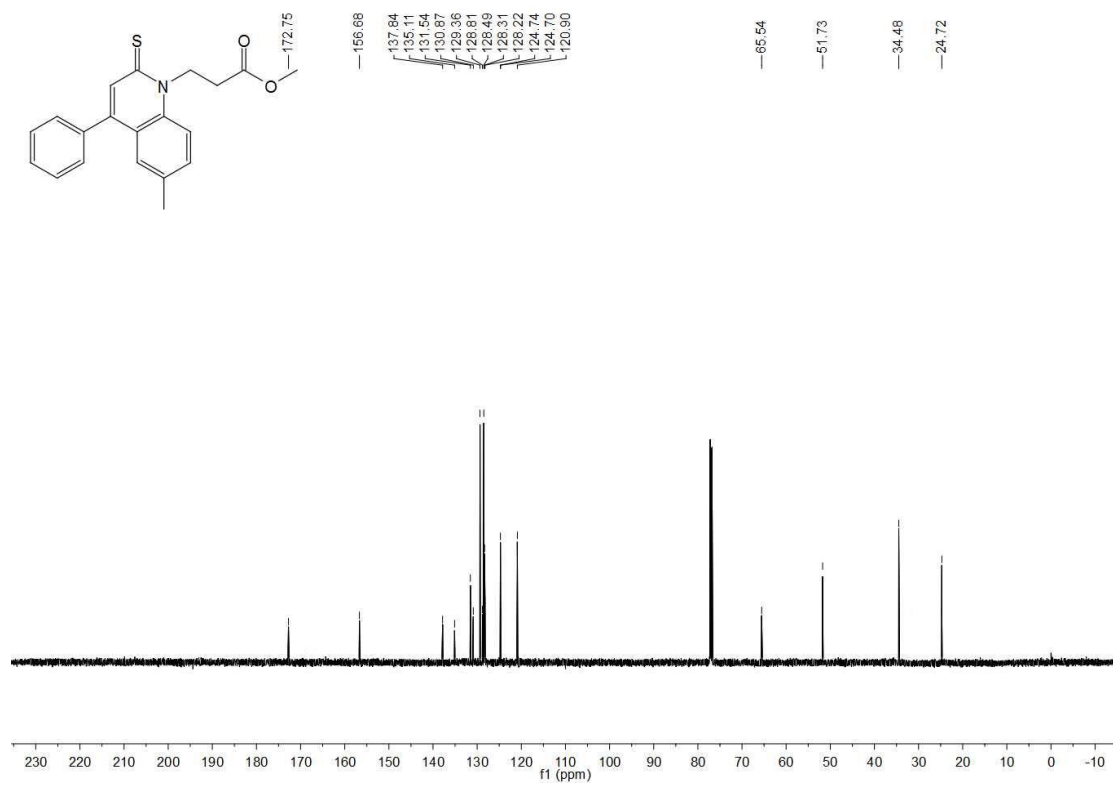

Copies of NMR of compound 7.

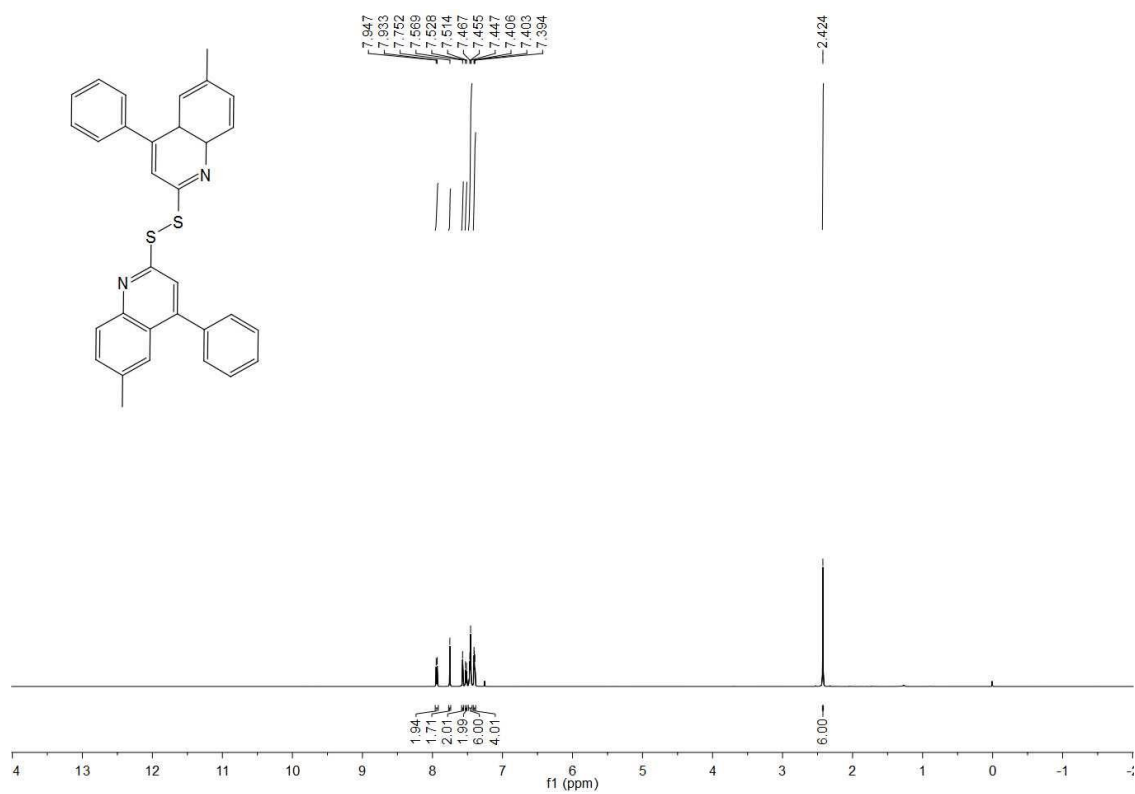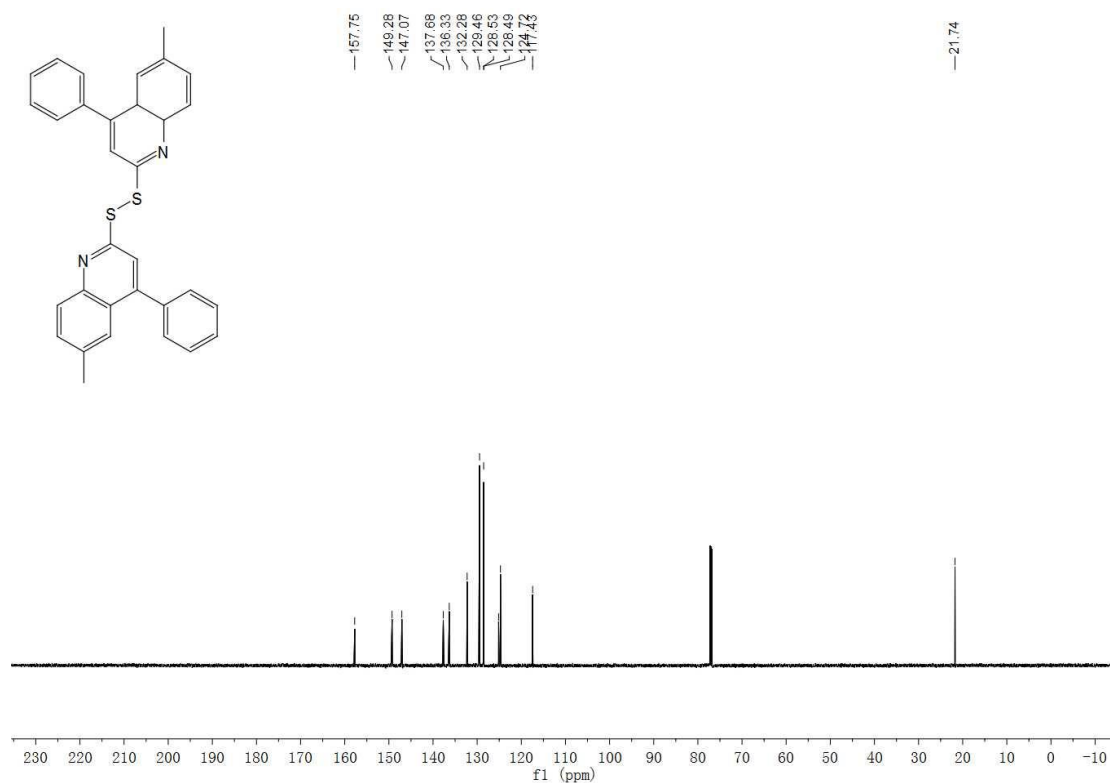

Supplement: c7cc07633a1.pdf [file c7cc07633a1.pdf]
